1 Bma-LAD-2, an intestinal cell adhesion protein, as a potential therapeutic target for  
2 lymphatic filariasis

3

4

5

6 Alexander F. Flynn<sup>1</sup>, Rebekah T. Taylor<sup>2</sup>, Marzena E. Pazgier<sup>3</sup>, Sasisekhar Bennuru<sup>4</sup>,  
7 Alyssa R. Lindrose<sup>5</sup>, Spencer L. Sterling<sup>1</sup>, C. Paul Morris<sup>6</sup>, Tim K. Mangel<sup>7</sup>, Thomas B.  
8 Nutman<sup>4</sup>, and Edward Mitre<sup>1</sup>

9

10 *<sup>1</sup>Department of Microbiology, F. Edward Hébert School of Medicine, Uniformed Services  
11 University of the Health Sciences, Bethesda, Maryland, United States of America*

12 *<sup>2</sup>Department of Biology, Frostburg State University, Frostburg, Maryland, United States  
13 of America*

14 *<sup>3</sup>Department of Medicine, F. Edward Hébert School of Medicine, Uniformed Services  
15 University of the Health Sciences, Bethesda, Maryland, United States of America*

16 *<sup>4</sup>National Institute of Allergy and Infectious Disease, National Institutes of Health,  
17 Bethesda, Maryland, United States of America*

18 *<sup>5</sup>The Henry M. Jackson Foundation for the Advancement of Military Medicine, Inc.,  
19 Bethesda, Maryland, United States of America*

20 *<sup>6</sup>Department of Pathology, Johns Hopkins Hospital, Baltimore Maryland, United States of  
21 America*

22 *<sup>7</sup>Laboratory for Biological Ultrastructure, Department of Biology, University of Maryland,  
23 United States of America*

## 24 **Abstract**

25           Lymphatic filariasis (LF) is a debilitating disease that afflicts over 70 million people  
26 worldwide. It is caused by the parasitic nematodes *Wuchereria bancrofti*, *Brugia malayi*,  
27 and *Brugia timori*. While efforts to eliminate LF have seen substantial success, complete  
28 eradication will likely require more time and resources than predicted. Identifying new  
29 drug and vaccine targets in adult filariae could help elimination efforts.

30           This study's aim was to evaluate intestinal proteins in adult *Brugia malayi* worms  
31 as possible therapeutic targets. Using siRNA, we successfully inhibited transcripts of four  
32 candidate genes: Bma-Serpin, Bma-ShTK, Bma-Reprolysin, and Bma-LAD-2. Of those,  
33 Bma-LAD-2, an immunoglobulin superfamily cell adhesion molecule (IgSF CAM), was  
34 determined to be essential for adult worm survival. We observed a 70.42% knockdown in  
35 Bma-LAD-2 transcript levels 1 day post-siRNA incubation and an 87.02% reduction in  
36 protein expression 2 days post-siRNA incubation. This inhibition of Bma-LAD-2  
37 expression resulted in an 80% decrease in worm motility over 6 days, a 93.43% reduction  
38 in microfilaria release (Mf) by day 6 post-siRNA incubation, and a significant decrease in  
39 MTT reduction. Transmission electron microscopy revealed the loss of microvilli and  
40 unraveling of mitochondrial cristae in the intestinal epithelium of Bma-LAD-2 siRNA-  
41 treated worms. Strikingly, Bma-LAD-2 siRNA-treated worms exhibited an almost  
42 complete loss of pseudocoelomic fluid, suggesting that loss of these tight junctions led to  
43 the leakage and subsequent loss of the worm's structural integrity. Luciferase  
44 immunoprecipitation system assay demonstrated that serum from 30 patients with LF did  
45 not have detectable IgE antibodies against Bma-LAD-2, indicating that LF exposure does  
46 not result in IgE sensitization to this antigen.

47           These results indicate that Bma-LAD-2 is an essential protein for adult *Brugia*  
48 *malayi* and may be an effective drug or vaccine target. In addition, these findings further  
49 validate the strategy of targeting the worm intestine to prevent and treat helminthic  
50 infections.

## 51 **Author Summary**

52           *Brugia malayi* is a parasitic nematode that can cause lymphatic filariasis, a  
53 debilitating disease prevalent in tropical and subtropical countries. Significant progress  
54 has been made towards eliminating the disease. However, complete eradication may  
55 require new therapeutics such as drugs or a vaccine that kill adult filariae. In this study,  
56 we identified an immunoglobulin superfamily cell adhesion molecule (Bma-LAD-2) as a  
57 potential drug and vaccine candidate. When we knocked down Bma-LAD-2 expression,  
58 we observed a decrease in worm motility, fecundity, and metabolism. We also visualized  
59 the loss of microvilli, destruction of the mitochondria in the intestinal epithelium, and loss  
60 of pseudocoelomic fluid contents after Bma-LAD-2 siRNA treatment. Finally, we  
61 demonstrated that serum from filaria-infected patients does not contain preexisting IgE to  
62 Bma-LAD-2, which indicates that this antigen would likely be safe to administer as a  
63 vaccine in endemic populations.

64

## 65 Introduction

66 Over 70 million people are infected worldwide with lymphatic filariasis (LF), a  
67 debilitating disease characterized by severe lymphedema, elephantiasis, and hydrocele  
68 [1, 2]. LF is caused by the parasitic nematodes *Wuchereria bancrofti*, *Brugia malayi*, and  
69 *Brugia timori*. Currently, efforts to eliminate this disease have been spearheaded by the  
70 Global Programme to Eliminate Lymphatic Filariasis (GPELF) [3]. While this campaign  
71 has reduced the overall prevalence of the disease, elimination target dates have been  
72 difficult to meet. According to a January 2020 WHO report on ending neglected tropical  
73 diseases, of the 71 countries endemic for LF in 2000, only 17 have been declared free of  
74 LF as a public health problem. The original goal set by the GPELF called for global  
75 elimination of LF as a public health problem by 2020, but this WHO report established a  
76 new goal of eliminating LF as a public health problem from 81% of endemic countries by  
77 2030 [4]. New strategies and therapeutics would likely improve our ability to meet this  
78 new target [5-7].

79 Current therapies for LF include diethylcarbamazine (DEC), ivermectin (IVM), and  
80 albendazole. While triple drug therapy with all three of these agents has shown great  
81 promise [8, 9], a major limitation of these medications is that DEC and IVM cannot be  
82 administered empirically in areas endemic for *Loa loa* or *Onchocerca volvulus* because  
83 the drugs can precipitate severe side effects by rapid killing of Mf [10-13].

84 To avoid side effects from killing of microfilariae in co-endemic populations and to  
85 potentially enable a single treatment cure of filarial infections, our group has focused on  
86 identifying drug and/or vaccine targets specific to adult filarial worms. Because adult  
87 worms contain a complete intestinal tract, whereas microfilariae do not, our group

88 evaluated the intestinal tract of adult filarial worms as a possible source of therapeutic  
89 targets. Already, this strategy appears to be promising against other helminths. Numerous  
90 studies have demonstrated protection against hookworm and barber pole worm infection  
91 using nematode intestinal antigens as vaccine candidates [14-19]. Furthermore, there  
92 seems to be little specific IgE against intestinal antigens in the sera of infected animal  
93 models as well as in previously exposed individuals [20, 21], suggesting that intestinal  
94 antigens maybe safe to administer as vaccines in endemic areas.

95 Our lab previously performed a proteomic analysis of the body wall, gut, and  
96 reproductive tract of *Brugia* adult worms [22]. We identified 396 proteins specific for the  
97 intestine, and then selected 9 for evaluation as potential drug and therapeutic targets.  
98 The selection criteria were 1) having high homology with orthologs in other filarial species  
99 and low homology to humans, 2) a large extracellular domain potentially accessible to  
100 drugs and antibody, and, 3) a predicted function likely essential for adult filaria survival.  
101 Previous work we have conducted found that another filarial intestinal antigen, Bm-UGT  
102 (UDP-glucuronosyl transferase), was essential for adult *B. malayi* survival and could be  
103 targeted with probenecid to achieve death of adult worms [23].

104 Using siRNA inhibition, we successfully knocked-down 4 target proteins. Of these,  
105 Bma-LAD-2, an IgSF CAM, was found to be essential for adult worm survival.  
106 Suppression of Bma-LAD-2 expression resulted in decreased worm motility, metabolism,  
107 and Mf release. Electron microscopy revealed that inhibition of Bma-LAD-2 resulted in  
108 almost complete loss of pseudocoelomic fluid, suggesting that disrupting the tight  
109 junctions between filarial intestinal cells and causing subsequent disruption of the worms'  
110 "hydrostatic skeleton" may be a novel mechanism to kill filarial parasites.

## 111 **Results**

### 112 **Structural Analysis of Bma-LAD-2**

113           The Bma-LAD-2 protein is 1171 AA in length (MW of 133310.4 Da), with a signal  
114 peptide, AA 1-18, a large extracellular segment at position 19-1120, a transmembrane  
115 portion at AA 1121-1143, and a small cytoplasmic domain at position 1143-1171 (Fig S1).  
116 The putative domain organization and model of the structure of the extracellular domain  
117 (residues 18-1120) is shown in Fig 1 for both the Bma-LAD-2 monomer and dimer. The  
118 Bma-LAD-2 monomer is predicted to fold into 6 immunoglobulin domains (Ig1-Ig6)  
119 followed by 5 fibronectin-type domains (FN1-5) (Fig 1A). The outermost N-terminal Ig  
120 domains are predicted to homodimerize to form tight junctions. The Bma-LAD-2 dimer  
121 model, based on dimerization mode of the homologous protein neurofascin [24], is  
122 stabilized by contacts between the domains of Ig1 and Ig2 paired in an orthogonal side-  
123 to-side stacking mode (Fig 1B). It is likely that prevention and/or disruption of formation  
124 of the tight Ig junction or destabilization and/or disruption of the Bma-LAD-2 dimer may  
125 lead to loss of Bma-LAD-2 function.

#### 126 **Fig 1. Molecular organization of Bma-LAD-2 extracellular domain.**

127 (A) Bma-LAD-2 monomer. Schematic domain organization (top panel) and model of  
128 monomer structure (bottom panel) assembled based on sequence similarity and available  
129 crystal structures of homologous proteins as described in Material and Methods. (B)  
130 Putative structure of Bma-LAD-2 dimer. Expanded view shows the dimer interface  
131 (indicated by red arrows) with Ig domains as labeled.

#### 132 **Bma-LAD-2 is phylogenetically related to orthologs found in other filarial worms**

133 Bma-LAD-2 has previously been shown to be a protein localized to the gut of adult  
134 *B. malayi* worms and to have a high predicted sequence homology with other filarial  
135 orthologs [22]. In this study, we generated a phylogenetic tree (Fig 2) to view the level of  
136 evolutionary relatedness between Bma-LAD-2 and orthologs from other filarial species  
137 and helminths. We found a close phylogenetic relation between Bma-LAD-2 and  
138 orthologs found in other filarial species and with orthologs of the intestinal helminths.  
139 Furthermore, the large phylogenetic distance to orthologs in humans, dogs, and cats  
140 suggests that filarial protein can likely be targeted by medications or vaccines with little  
141 risk to the host.

#### 142 **Fig 2. Phylogenetic tree of *Bma-LAD-2* and orthologs from other helminths.**

143 The amino acid sequence of *Bma-LAD-2* (WormBase gene ID: WBGene00227085) has  
144 high level of relatedness to other filarial species and is evolutionarily distant from cats,  
145 dogs, and humans. Based on sequence alignment using MULTiple Sequence Comparison  
146 by Log-Expectation (MUSCLE), the phylogenetic tree was constructed by the maximum  
147 likelihood method. The phylogenetic scale represents genetic change as defined by the  
148 average number of nucleotide substitutions per site. The numbers at each branch  
149 represent the bootstrap value out of a 100.

#### 150 ***Bma-LAD-2* is expressed throughout the lifecycle of *B. malayi* adult worms**

151 To determine whether *Bma-LAD-2* is expressed in a stage-specific manner, we  
152 analyzed stage-specific transcriptomic data on *Brugia malayi* worms [25]. We found that  
153 *Bma-LAD-2* RNA was expressed in the Mf, L3, L4, and adult stages regardless of gender.  
154 The highest expression levels based on normalized read values occurred in mature  
155 microfilaria (44 RPKM) followed by adult female filaria (26 RPKM). Overall, *Bma-LAD-2*

156 transcript levels appeared to be similar across the different life stages. Next, we looked  
157 at a study evaluating the proteome for the different stages of *B. malayi* [26]. The study  
158 matched 3 unique peptides to Bma-LAD-2 from Mf, 1 from the L3 stage, 2 from adult  
159 females, and 1 from adult males, suggesting that Bma-LAD-2 is expressed during Mf and  
160 L3 stages, as well as in both genders of adult worms. Like the transcriptome data, these  
161 spectra values indicate fairly consistent expression of Bma-LAD-2 among the larval  
162 stages.

### 163 **Cy3-labeled siRNA enters the intestinal tract of *B. malayi* adult worms**

164 Prior to siRNA knockdown, we investigated whether Bma-LAD-2 siRNA  
165 conjugated to cy3 could be visualized in the intestinal tract of adult filariae. We incubated  
166 the adult female worms with labeled siRNA for 24 hrs and then observed them using  
167 epifluorescent microscopy. The cy3-labeled siRNA (Fig 3A-B) was easily seen in the  
168 intestinal tract of the treated worms. As expected, minimal signal was visualized in the  
169 intestine of worms treated with only culture media (Fig 3C-D). We therefore concluded  
170 that siRNA targeting Bma-LAD-2 transcript could enter the intestinal tract of adult filarial  
171 worms.

### 172 **Fig 3. cy3-labeled *Bma*-LAD-2 siRNA entry into the intestinal tract of female *B.*** 173 ***malayi* adult worms.**

174 *B. malayi* adult female worms soaked in cy3-labeled siRNA (red) for 24 hrs and visualized  
175 at magnifications of (A) 40x and (B) 100x. As a negative control, worms were cultured in  
176 only media for 24 hrs and visualized at magnifications of (C) 40x and (D) 100x. Worms  
177 were counterstained with DAPI (blue).



178 **Bma-LAD-2 siRNA treatment results in reduced transcript and protein expression**

179 After observation of Bma-LAD-2 siRNA entry into the intestine, gene and protein  
180 expression was evaluated by quantitative reverse transcription PCR (RT-qPCR) and  
181 Western blot respectively. cDNA was generated using mRNA isolated from adult female  
182 *B. malayi* cultured in media alone, Bma-LAD-2 siRNA, and scrambled siRNA for 1 day  
183 and 6 days post-siRNA incubation. By quantifying *B. malayi lad-2* gene expression  
184 normalized to *Bma-gapdh* under each condition, we observed a 70.42% decrease in  
185 Bma-LAD-2 transcript levels (Fig 4A) in worms treated with target specific siRNA  
186 (mean=0.2662) compared to the scrambled siRNA-treated filariae (mean=0.9) relative to  
187 the media control group at 1 day post-siRNA incubation. Bma-LAD-2 protein expression  
188 was visualized by immunoblotting in worms treated with specific or scrambled siRNA. A  
189 dramatic decrease in Bma-LAD-2 expression was observed in the specific siRNA-treated  
190 worms compared to the controls (Fig 4B).

191 **Fig 4. Treatment with Bma-LAD-2-specific siRNA reduces target transcript and**  
192 **protein levels in adult female *B. malayi* worms.**

193 Adult female filaria were cultured in Bma-LAD-2 siRNA, scrambled siRNA, or media  
194 alone. (A) The *Bma-lad-2* transcript level was reduced in specific siRNA-treated groups  
195 (n=3) compared to the scrambled controls (n=3) normalized to *Bma-gapdh*. Ordinary one-  
196 way ANOVA followed by Tukey's multiple comparison test was used to generate the p-  
197 values. These experiments were successfully repeated twice and the data shown is from  
198 a single representative experiment; mean + SEM. (B) Bma-LAD-2 levels were assessed  
199 24 hrs post-siRNA incubation by Western blot using anti-Bma-LAD-2 antibodies. (C)

200 Western blot quantification was performed using the ImageStudioLite software. The  
201 signal intensities of anti-Bma-LAD-2 were normalized to those of beta-actin.

## 202 **Reduced worm viability and fecundity in Bma-LAD-2 siRNA-treated adult filariae**

203 We evaluated the effects of Bma-LAD-2 knockdown on worm motility, Mf release,  
204 and (4,5-dimethylthiazol-2-yl)-2,5-diphenyltetrazolium bromide (MTT) reduction. At day 1  
205 post-siRNA incubation, worm motility (Fig 5A) was significantly reduced ( $p < 0.0001$ ) in  
206 worms soaked in Bma-LAD-2 siRNA (mean=0.8) compared to the control group  
207 (mean=4). By day 6 post-incubation, we observed an 85% reduction in motility relative to  
208 the controls (mean=4) for the specific siRNA-treated group (mean=0.6).

209 We next evaluated Mf release per adult worm per 24 hr period for each group at  
210 timepoints 1 and 6 days post-siRNA incubation. While no reduction in Mf release was  
211 observed at one day after treatment with siRNA, Mf release was 93.4% lower from Bma-  
212 LAD-2 siRNA treated adult filariae compared to Mf release from worms incubated with  
213 media alone (Fig 5B).

214 Finally, two randomly selected adult worms from each group were assessed by  
215 MTT reduction assay at each timepoint. At day 1 post-siRNA treatment, MTT reduction  
216 by *B. malayi* treated with target siRNA was 46% less than MTT reduction observed by  
217 worms treated with scrambled siRNA relative to the media control group ( $p = 0.014$ , Fig  
218 5C). By day 6, we observed an 83.25% decrease in MTT reduction by the Bma-LAD-2  
219 siRNA group compared to worms treated with scrambled siRNA (Fig 5C). Given the  
220 above results, we conclude that Bma-LAD-2 is an essential protein for *B. malayi* adult  
221 worm survival *in vitro* and knockdown results in death of the adult worm as defined by  
222 motility, fecundity, and metabolism.

223 **Fig 5. Bma-LAD-2 knockdown results in decreased worm motility, microfilariae**  
224 **release, and metabolism.**

225 Reducing Bma-LAD-2 expression in female *B. malayi* adult worms resulted in decreased  
226 (A) motility (n=5; Day 1, p<0.0001; Day 6, p=0.0004), (B) microfilaria count per worm  
227 (n=5; Day 1, p=ns; Day 6, p<0.0001) per 24-hr period, and (C) metabolism (n=2; Day 1,  
228 p=0.0139; Day 6, p=0.0007) as measured by MTT reduction at timepoints 1 and 6 days  
229 post-siRNA treatment. For motility (A) and microfilaria release (B), an ordinary one-way  
230 ANOVA followed by Tukey's multiple comparison test was used to generate the p-values  
231 while p-values for metabolism (C) were generated by an unpaired t-test. These  
232 experiments were successfully repeated twice and the data presented is representative  
233 of a single experiment; mean + SEM.

234 **Bma-LAD-2 knockdown results in ablation of microvilli and loss of pseudocoelomic**  
235 **fluid**

236 Bma-LAD-2 is predicted to be an adhesion protein located at the apical junction of  
237 the intestinal tract [22]. Therefore, we evaluated the structure of the adult filaria intestinal  
238 tract after treatment with Bma-LAD-2 siRNA using transmission electron microscopy  
239 (TEM). As seen in Fig 6, microvilli lining the epithelium of the intestinal tract are present  
240 in untreated *B. malayi* adults. In contrast, adult worms treated with Bma-LAD-2 siRNA  
241 exhibit near complete ablation of intestinal microvilli (Fig 7). In addition, many of the apical  
242 junctions in the intestinal tract of treated worms appear shortened, and many of the  
243 mitochondria had misshaped cristae.

244 **Fig 6. Intestinal tract of a female *B. malayi* adult worm.** Image was captured by  
245 transmission electron microscopy (TEM) at 4,000x. Adult filaria were cultured in media

246 alone for 72 hrs. Microvilli (black arrowhead) line the apical surface of the intestinal  
247 epithelium. Other structures visible are apical junctions (white arrowhead), nuclei (Nu),  
248 lipid droplets (L), and mitochondria (black arrow)

249 **Fig 7. Intestinal tract of a female *B. malayi* adult worm treated with *Bma*-LAD-2**  
250 **siRNA.** Image was captured by transmission electron microscopy (TEM) at 4,000x. Adult  
251 filaria were incubated with *Bma*-LAD-2 siRNA for 24 hrs and then cultured in media alone  
252 for an additional 48 hrs. Microvilli (black arrowhead) are largely absent from the apical  
253 surface of the intestinal epithelium. There are some vestigial microvilli have been  
254 invaginated by the surrounding epithelium. Other structures visible are apical junctions  
255 (white arrowhead), nuclei (Nu), and lipid droplets (L). Many mitochondria (black arrow)  
256 appear to have unraveled cristae.

257 **Fig 8. Intestinal tract of a *B. malayi* adult worm treated with *Bma*-LAD-2 siRNA loses**  
258 **pseudocoelomic fluid.**

259 The cross-sectional images were captured by transmission electron microscopy (TEM) at  
260 500x. The adult filaria treated with siRNA (A) has lost most of the pseudocoelomic fluid  
261 surrounding the intestinal and uterine tubes, and appears to have fluid within the intestinal  
262 lumen. In contrast, the untreated filaria (B) has a normal distribution of pseudocoelomic  
263 fluid in the spaces around the intestinal and uterine tracts. PF = pseudocoelomic fluid, IT  
264 = intestinal tube, UT = uterine tube.

265 Interestingly, when observed at lower magnification, enabling visualization of the  
266 entire nematode cross-section, it is apparent that the pseudocoelomic fluid is absent or  
267 markedly diminished in treated adult filariae (Fig 8). While untreated worms display  
268 pseudocoelomic fluid separating the intestinal tract from the uterine tubes at all cross-

269 sections analyzed, Bma-LAD-2 siRNA-treated worms demonstrated direct contact  
270 between the intestinal tract and the uterine tubes. In toto, the imaging findings suggest  
271 that knockdown of Bma-LAD-2 results in reduction of tight junctions between intestinal  
272 epithelial cells, escape of pseudocoelomic fluid from the internal body cavity into the  
273 intestinal tract, and subsequent loss of the integrity of the filarial hydroskeleton.

#### 274 **No detectable Bma-LAD-2 specific IgG or IgE in serum from filarial patients**

275 A major concern when evaluating possible vaccine candidates for helminths is  
276 whether populations in endemic areas are IgE-sensitized to the candidate antigen [27].  
277 Thus, we investigated whether serum from filaria-infected individuals contains IgE that  
278 recognizes Bma-LAD-2. A luciferase immunoprecipitation system assay was employed  
279 to detect antibody levels in the patient serum samples using a Bma-LAD-2-luciferase  
280 fusion protein. Patients were categorized as presenting with asymptomatic microfilaremia  
281 (n=13), chronic pathology (lymphedema) (n=9), or tropical pulmonary eosinophilia (n=8).  
282 Sera used in this experiment were obtained from patients prior to anthelmintic treatment.  
283 We also tested sera from individuals with no clinical or laboratory evidence of a filarial  
284 infection (n=5) as well as healthy sera from blood bank donors (n=5). As positive controls,  
285 we used affinity-purified polyclonal antibodies raised in rabbits immunized with  
286 recombinant Bma-LAD-2 as well as the rabbit anti-sera. Naïve rabbit sera served as a  
287 negative control.

288 We found that serum samples from patients with lymphatic filariasis had no  
289 detectable pre-existing IgG (Fig 9A) or IgE (Fig 9B) against Bma-LAD-2 fusion protein.  
290 As expected, there was recognition by the polyclonal antibodies and anti-sera against the  
291 fusion protein. This indicated that our fusion protein exhibited the proper conformation

292 and thus the absence of signal in filarial patient samples was due to absence of Bma-  
293 LAD-2 specific IgG or IgE.

294 **Fig 9. Filarial patient serum does not contain detectable IgG or IgE against *Bma*-**  
295 **LAD-2.**

296 Serum from filaria-infected individuals was incubated with a *Bma*-LAD-2-luciferase fusion  
297 protein. There was no detectable (A) IgG and (B) IgE in the patient serum as measured  
298 by the LIPS assay. As a positive control for IgG binding, *Bma*-LAD-2 rabbit polyclonal  
299 antibodies recognized the fusion protein. HIES=hyper IgE syndrome, MF=microfilaremic,  
300 CP=chronic pathology, EN=endemic normal, BB=blood bank donors, TPE=tropical  
301 pulmonary eosinophilic, Peptide Ab=*Bma*-LAD-2 rabbit polyclonal antibodies, Mouse  
302 antisera=serum from *Litomosoides sigmodontis* vaccinated mice

303 **siRNA knockdown of other intestinal antigens of *B. malayi***

304 In this study, we also attempted to evaluate whether 7 other intestinal proteins  
305 were essential for adult *B. malayi* survival (Table 1). The proteins selected for  
306 investigation were annotated as adhesion molecules, proteases, protease inhibitors, or  
307 involved in glycosylation based on work from previous studies [22, 26]. We were able to  
308 successfully knockdown gene expression for 3 of these target proteins. This limited  
309 success with siRNA inhibition was not entirely unexpected given the reported variability  
310 and difficulty of performing RNA interference in parasitic nematodes [28, 29]. Of note,  
311 unlike knockdown of *Bma*-LAD-2, successful siRNA inhibition of *Bma*-serpin (a protease  
312 inhibitor) and *Bma*-reprolysin (a protease) did not cause any appreciable phenotypic  
313 changes in adult *B. malayi* worms. siRNA inhibition of *Bma*-shstk, also a predicted

314 protease, caused only minimal decreases in adult worm motility and metabolism.

| Gene Target               | Pub locus | Function           | Motility  | Mf Release | Metabolism | Transcript knockdown |
|---------------------------|-----------|--------------------|-----------|------------|------------|----------------------|
| <i>Bma-serpin</i>         | Bm1_09775 | Protease inhibitor | No change | No change  | No change  | Yes                  |
| <i>Bma-shtk</i>           | Bm1_00205 | Protease           | Minimal   | No change  | Mild       | Yes                  |
| <i>Bma-reprolysin</i>     | Bm1_53050 | Protease           | No change | No change  | No change  | Yes                  |
| <i>Bma-fukutin</i>        | Bm1_44655 | Glycosylation      | No change | No change  | No change  | No                   |
| <i>Bma-peptidase</i>      | Bm1_38300 | Protease           | No change | No change  | No change  | No                   |
| <i>Bma-egf-like-02820</i> | Bm1_02820 | Adhesion           | No change | No change  | No change  | No                   |
| <i>Bma-egf-like-48010</i> | Bm1_48010 | Adhesion           | No change | No change  | No change  | No                   |

315

316 **Table 1.** siRNA experiments targeting other intestinal proteins in *B. malayi* adult female  
317 worms.

## 318 **Methods**

### 319 **Parasites and culture**

320 *B. malayi* female adults were obtained from the NIH/NIAID Filariasis Research  
321 Reagent Resource Center (FR3) and TRS Laboratories in Athens, Georgia, USA. Before  
322 siRNA inhibition, adult worms were incubated in Dulbecco's Modified Eagle's Medium  
323 (Corning Cellgro) supplemented with 10% heat-inactivated fetal bovine serum (Atlanta  
324 Biologicals), 100 units/mL of penicillin, 100 ug/mL of streptomycin, and 1% L-glutamine  
325 (Sigma) for 24 hrs at 37°C in 5% CO<sub>2</sub>. Infection studies conducted at FR3 and TRS  
326 received approval from their respective Animal Care and Use Committees. Protocol  
327 approval for receipt of filarial worms from FR3 and TRS for use at the Uniformed Services

328 University of the Health Sciences (USUHS) was granted by the USUHS Animal Care and  
329 Use Committee.

### 330 **Phylogenetic tree analysis**

331 We investigated the degree of relatedness between helminth orthologs and Bma-  
332 LAD-2. As an outlier group for the phylogenetic tree, we included dogs, humans, and cats,  
333 which were expected to have a significantly distant relation to Bma-LAD-2 given the low  
334 predicted sequence homology. The tree was constructed based on the likelihood  
335 estimation method for the LG model using aligned sequences by Multiple Sequence  
336 Comparison by Log-Expectation (MUSCLE)

337 Orthologs from nematode species were selected using a BLAST query of the  
338 WormBase Parasite database [30] against the Bma-LAD-2 protein sequence  
339 (WBGene00227085). The following are the nematode species along with the accession  
340 codes for each ortholog identified: *Brugia timori* (BTMF\_0000455001), *Wuchereria*  
341 *bancrofti* (maker-PairedContig\_4689-snap-gene-5.23), *Brugia pahangi*  
342 (BPAG\_0001424601), *Loa loa* (LOAG\_18710), *Dirofilaria immitis* (nDi.2.2.2.t02266),,  
343 *Haemonchus contortus* (HCON\_00104790), *Necator americanus* (NECAME\_12511),  
344 *Onchocerca volvulus* (Ovo-lad-2), *Caenorhabditis elegans* (lad-2), *Acanthocheilonema*  
345 *viteae* (nAv.1.0.1.t02543-RA), and *Ancylostoma duodenale* (ANCDUO\_13310).

346 Orthologs from select mammals were identified using a BLAST query of the  
347 National Center of Biotechnology Information (NCBI) databases for the Bm-UGT peptide  
348 sequence. The following are the orthologs selected for analyses: *Homo sapiens*  
349 (NP\_001153805.1), *Canis lupus familiaris* (XP\_005640833.2), and *Felis catus*  
350 (XP\_023103545.1).



## 351 **Structural analysis of Bma-LAD-2**

352 Molecular model of the monomer and dimer of the extracellular domain of Bma-  
353 LAD-2 (residues 19-1120) was generated based on available structures/oligomerization  
354 modes of homologous proteins. The Ig1-Ig4 region was modeled using the structure of  
355 neurofascin, a member of the L1 family of neural cell adhesion molecules (sequence  
356 identity of 31%, PDB code: 3P3Y [24] and Ig5-6 and FN1-3 based upon the structures of  
357 contactin-3-6 (CNTN3-6), a group of glycoposphatidylinositol-anchored cell adhesion  
358 molecules (sequence identity of 28%, PDB code: 5I99, [31] and FN4-5 based upon the  
359 structure of a fragment encompassing the first four FN domains of the leucocyte common  
360 antigen-related protein (LAR), a post-synaptic type I transmembrane receptor protein  
361 (sequence identity 27%, PDB code: 6TPW) [32]. The dimer was assembled using the  
362 structure of neurofascin (PDB codes: 3P3Y and 3P40, [24] that assembles into  
363 symmetrical dimers in the crystal. The figure was generated using the PyMOL Molecular  
364 Graphics System, Version 2.0 Schrödinger, LLC (<https://pymol.org/2/>).

## 365 **siRNA for RNAi**

366 BLOCK-iT™ RNAi Designer was employed for selecting siRNA duplexes of  
367 candidate genes for gene silencing activity and specificity. The siRNA sequence with the  
368 greatest probability of success was selected for each target, and for some targets multiple  
369 sequences were selected to improve knockdown success. Life Technologies synthesized  
370 the target-specific siRNAs for Bma-LAD-2, Bma-Fukutin, Bma-ShTK, and Bma-Serpin  
371 and purified the complexes by standard desalting methods. Target-specific siRNAs for  
372 Bma-EGF-like-02820, Bma-EGF-like-48010, Bma-Peptidase, and Bma-Reprolysin were

373 obtained through Dharmacon. The 5'-3' siRNA sequences used in this experiment are as  
374 follows:

375 Bma-LAD-2 siRNA 1

376 sense: 5' GCAAGUACUACCAUACUAUdTdT 3'

377 antisense: 5' AUAAGUUGGAAUUCGUUGCdTdT 3'

378 Bma-LAD-2 siRNA 2

379 sense: 5' GCGCAUAUCGCAAGUAAAUdTdT 3'

380 antisense: 5' AUUUACUUGCGAUAUGCGCdTdT 3'

381 Bma-LAD-2 siRNA 3

382 sense: 5' GCGAAUAGUCGAUACCUAAAdTdT 3'

383 antisense: 5' UUAGGUAUCGACUAUUCGCdTdT 3'

384 Bma-Fukutin siRNA 1

385 sense: 5' CCACCCATTTTCGCAGATTT 3'

386 antisense: 5' AAAUCUGCGAAAUGGGUGGdTdT 3'

387 Bma-Fukutin siRNA 2

388 sense: 5' GGAGCGAGAGTGAATGGAAAdTdT 3'

389 antisense: 5' UUCAUUCACUCUCGCUCdCdTdT 3'

390 Bma-Fukutin siRNA 3

391 sense: 5' GCTAACGTTGCAAATTATTdTdT 3'

392 antisense: 5' AAUAAUUUGCAACGUUAGCdTdT 3'

393 Bma-ShTK siRNA 1

394 sense: 5' GCGCCTTCTACAGCAGTAAAdTdT 3'

395 antisense: 5' GCGCCUUCUACAGCAGUAAAdTdT 3'

396 Bma-ShTK siRNA 2

397 sense: 5' GGUGGUAUGAAUAGCAUAAAdTdT 3'

398 antisense: 5' UUAUGCUAUUCAUACCACCDTdT 3'

399 Bma-ShTK siRNA 3

400 sense: 5' GCUAAAGAACUAUGCGCUAdTdT 3'

401 antisense: 5' UAGCGCAUAGUUCUUUAGCdTdT 3'

402 Bma-Serpin siRNA

403 sense: 5' GGAUUUCGAGUGAGACAAAdTdT 3'

404 antisense: 5' UUUGUCUCACUCGAAAUCCdTdT 3'

405 Bma-EGF-like-02820 siRNA

406 sense: 5' GUAUCGAGGGCAAGGGAAAdTdT 3'

407 antisense: 5' UUUCCCUUGCCCUCGAUACdTdT 3'

408 Bma-EGF-like-48010 siRNA

409 sense: 5' GCAACAAAUGCAAGAAUAAAdTdT 3'

410 antisense: 5' UUAUUCUUGCAUUUGUUGCdTdT 3'

411

412 Bma-Peptidase siRNA 1

413 sense: 5' AGGAAAGGUUGUUAGGAUAdTdT 3'

414 antisense: 5' UAUCCUAACAACCUUUCUdTdT 3'

415 Bma-Reprolysin siRNA 3

416 sense: 5' GGAUAAUGUGAAAGGAAUAdTdT 3'

417 antisense: 5' UAUUCCUUUCACAUUAUCCdTdT 3'

418 **Assessment of siRNA uptake by fluorescence microscopy**

419 Adult female worms were incubated with 5  $\mu$ M of 5' cy3-labeled *Bma-lad-2* siRNA  
420 1 (Sigma Aldrich) for 24 hrs to evaluate uptake of siRNA into intestinal tract epithelial  
421 cells. Adult female worms were cultured in media alone as a negative control. As a  
422 counterstain, samples were treated with 10  $\mu$ g/mL of 4',6-Diamidino-2-phenylindole  
423 dihydrochloride (DAPI, Sigma-Aldrich) in PBS. Images were obtained with a Nikon  
424 Eclipse E600 fluorescent microscope and converged by NIS-Elements software.

425 **siRNA treatment of *B. malayi***

426 For siRNA inhibition of the target gene expression, we soaked *B. malayi* adult  
427 female worms in culture media with siRNA slightly modifying a previously established  
428 protocol [33]. For each timepoint, we incubated 5 adult female worms for 24 hrs in an  
429 equal mixture of the siRNAs (Bma-LAD-2, Bma-Fukutin, Bma-ShTK, Bma-Serpin) or one  
430 siRNA (Bma-EGF-like-02820, Bma-EGF-like-48010, Bma-Peptidase, Bma-Reprolysin) at  
431 a total concentration of 5  $\mu$ M in 850  $\mu$ L of media in a 5000 MWCO Pur-A-Lyzer™ dialysis  
432 tube (Sigma-Aldrich). Previous studies have shown that this concentration of siRNA

433 sufficiently silences gene expression [33-36]. We placed the dialysis tubes in a beaker  
434 with 500 mL of culture media at 37°C in 5% CO<sub>2</sub>. For the control groups, 5 adult female  
435 worms were incubated alone in media or with scrambled siRNA (5 μM) under conditions  
436 similar to the target siRNA-treated group. The worms were extracted after the 24-hr  
437 incubation and placed individually into 1 mL of culture media. Initially, worms were  
438 evaluated 1 day post-incubation for transcript knockdown, worm motility, MTT reduction,  
439 and microfilariae release. For Bma-LAD-2, we conducted additional experiments to  
440 evaluate the worms at 6 days post-siRNA incubation.

#### 441 **Evaluation of worm motility**

442 Motility was evaluated based on the following scale 4 = active movement, 3 =  
443 modest reduction in movement, 2 = severe reduction in movement, 1 = twitching, and 0  
444 = no movement. A blinded observer rated worm motility for each group under a dissecting  
445 microscope.

#### 446 **Measuring MTT reduction**

447 Metabolic function was evaluated using a (4,5-dimethylthiazol-2-yl)-2,5-  
448 diphenyltetrazolium bromide (MTT) assay from Sigma [37]. For each group per timepoint,  
449 2 worms were treated with 0.5 mg/mL of MTT in 0.5 mL of PBS for 30 minutes at 37°C in  
450 5% CO<sub>2</sub>. Each worm was then transferred into a well containing 200 μL of DMSO of a 96-  
451 well plate at room temperature for 1 hr. Quantification of MTT reduction was measured  
452 based on absorbance relative to a DMSO blank at 570 nm with a Synergy HTX multi-  
453 mode plate reader (BioTek).

#### 454 **Quantifying microfilaria (Mf) release**

455 Prior to quantifying Mf release, we incubated the adult worms in 1 mL of fresh  
456 media for 24 hrs. The adult filariae were then removed for evaluation by the MTT reduction  
457 assay and RT-qPCR. The Mf were enumerated under a light microscope at high  
458 magnification in the wells containing expended media.

#### 459 **RNA extraction and analysis of RNA levels by RT-qPCR**

460 Adult *B. malayi* female worms were treated with TRIzol (Thermo Fischer Scientific)  
461 and subjected to three freeze/thaw cycles. Adult filariae were then placed in Matrix D lysis  
462 tubes (MP Biomedicals) and homogenized by a FastPrep™-24 Biopulverizer (MP  
463 Biomedicals) for 7 minutes at 6 m/s. We added chloroform to the homogenate and phase  
464 separated the mixtures in Phase Lock Gel tubes (5Prime) at 11,900 g for 15 minutes at  
465 4°C. After the top layer (aqueous phase) was collected, we precipitated the RNA using  
466 cold isopropanol and then pelleted it at 12,000 g for 1 hr. The RNA pellet was washed  
467 twice using cold 75% ethanol. We resuspended the RNA in nuclease-free water and  
468 quantified the sample concentrations using a NanoDrop 1000 (Thermo Fischer Scientific).  
469 Using Superscript IV (Thermo Fischer Scientific), we synthesized cDNA from mRNA per  
470 the manufacturer's protocol. We quantified target gene and *B. malayi* house-keeping  
471 gene *gapdh* expression levels in duplicate 20 µL reactions using 1 µL of 20X TaqMan™  
472 gene expression assay (Thermo Fischer), 1 µL of cDNA, and 18 µL of TaqMan™ gene  
473 expression master mix (Applied Biosystems). We employed the following PCR conditions:  
474 2 min at 50 °C, 10 min at 95 °C, 40 cycles of 15 sec at 95 °C, and 1 min at 60 °C cycle of  
475 50 °C with a 7500 Real-Time PCR System (Applied Biosystems). The following Taqman  
476 primer and internal probes were used:

477 *Bma-gapdh*:

478 Forward primer: 5' TTGATCTCACTTGCCGACTC 3'  
479 Reverse primer: 5' TGGTCTTCGGTGTATTCCAA 3'  
480 Internal probe: 5' CAGCTAATGGACCGATGAAGGGGA 3'

481 *Bma-lad-2:*

482 Forward primer: 5' GTGATCCACGGCTTACGATT 3'  
483 Reverse primer: 5' CAGGCACATCAAGCACAGTT 3'  
484 Internal probe: 5' TGCTCGTGGCTTTCATTCAGGA 3'

485 *Bma-futkin:*

486 Forward primer: 5' AGGTTATTTTCATGTGCCCTGC 3'  
487 Reverse primer: 5' ATTCCATTCACTCTCGCTCCA 3'  
488 Internal probe: 5' AGGCGGATTACGGTAATTGGCGAGT 3'

489 *Bma-shtk:*

490 Forward primer: 5' TGCACTGATCCAATGGCAAA 3'  
491 Reverse primer: 5' GTTACTGCTGTAGAAGGCGC 3'  
492 Internal probe: 5' TGCGCCAAAACATGTGGATTTTGC GG 3'

493 *Bma-serpin:*

494 Forward primer: 5' ACGTGCGCAGTTAGACTTTG 3'  
495 Reverse primer: 5' GCCTCTGCGATATAAGCCAA 3'  
496 Internal probe: 5' GCGGACGGTGAAACGAAGCAGCA 3'

497 *Bma-egf-like-02820:*

498 Forward primer: 5' GCTTACACGGTGGCAGAAAA 3'

499 Reverse primer: 5' AAGCCACCTATCTGCTCTCC 3'

500 Internal probe: 5' TCGAGGGCAAGGGAAAAGTGGAA 3'

501 *Bma-egf-like-48010:*

502 Forward primer: 5' ACCTGGCTTCATGGGAGAAA 3'

503 Reverse primer: 5' CTTACCCACAGTCGCAAACA 3'

504 Internal probe: 5' TGCTGCCGGTCTTATGGGCG 3'

505 *Bma-peptidase:*

506 Forward primer: 5' CAGCCATTATTGGCCAGGAC 3'

507 Reverse primer: 5' AAATGAAGTGGTGCCGCATT 3'

508 Internal probe: 5' AGCCTTCCAAGTGGTTCATCCCAACA 3'

509 *Bma-reprolysin:*

510 Forward primer: 5' TGGAACACAGTGATCAGGCT 3'

511 Reverse primer: 5' AACGGCATTCCACTTATCG 3'

512 Internal probe: 5' CCCATTTTCGTGTGCAATAGTTGCAGCA 3'

### 513 **Generation of anti-Bma-LAD-2 polyclonal antibodies**

514 For the immunoblot analysis and LIPS assay, polyclonal anti-Bma-LAD-2 peptide  
515 antibodies were generated by Genscript. Rabbits were immunized with Bma-LAD-2  
516 peptide sequences conjugated to keyhole limpet hemocyanin (KLH). The peptide



517 sequences used are as follows: CYEKDEHLIAEGRPN, DSTGSKLAKTVKIDC, and  
518 CGQIANFDPYGRKMS. To facilitate binding to KLH, cysteines were added at either the  
519 N- or C-terminus of the peptides.

## 520 **Immunoblot analysis of Bma-LAD-2**

521 Prior to Western blot analysis, we incubated *B. malayi* adult female worms in 5  $\mu$ M  
522 of Bma-LAD-2 siRNA for 24 hrs followed by an additional 24 hr culture in fresh media.  
523 The adult filariae were transferred into Matrix D lysis tubes (MP Biomedicals) with PBS  
524 (pH 7.4) and 4  $\mu$ L of Halt™ Protease Inhibitor Cocktail (Thermo Scientific) and then  
525 homogenized using a FastPrep™-24 Biopulverizer (MP Biomedicals) for 3 min at 4 m/s.  
526 Protein concentration was quantified by Bradford protein assay (Bio-Rad). Protein lysate  
527 (10  $\mu$ g) was separated on 10% Bis-Tris NuPAGE gel (Invitrogen) and then transferred  
528 onto a 0.2  $\mu$ m nitrocellulose filter paper (Bio-Rad). The filter paper was blocked overnight  
529 in 5% bovine serum albumin (BSA) in tris-buffered saline with 0.1% Tween 20 (TBS-T).  
530 After the overnight blocking, the membrane was incubated with 1:7000 polyclonal anti-  
531 Bma-LAD-2 peptide antibodies (Genscript) and 1:1000 rabbit anti- $\beta$  actin antibodies  
532 (Abcam) for 1 hr. The membrane was washed three times with TBS-T for 15 min.  
533 Horseradish peroxidase conjugated goat anti-rabbit IgG antibody was incubated for 1 hr  
534 with the filter paper at a dilution of 1:2000. After washing again with TBS-T, the membrane  
535 was developed with Chemiluminescent reagent, SuperSignal™ West Pico PLUS (Thermo  
536 Scientific).

## 537 **Transmission electron microscopy**

538 *B. malayi* female worms (3) were treated with Bma-LAD-2 siRNA for 24 hrs and  
539 then cultured for an additional 48 hrs. An equal number of adult female worms were  
540 incubated in media alone for same amount of time. Both groups of filariae were processed  
541 for imaging by electron microscopy. This whole process was repeated on two separate  
542 occasions. For morphological evaluation, the female filariae were first washed in PBS (pH  
543 7.4) and then fixed with 2.5% paraformaldehyde, 1% glutaraldehyde in 0.12 M Millong's  
544 phosphate buffer (pH 7.4) overnight at room temperature. Following this step, the  
545 samples were post-fixed with 1% osmium tetroxide in 0.12 M Millong's phosphate buffer  
546 (pH 7.4) for 100 min and then fixed en bloc with 2% aqueous uranyl acetate for 90 min.  
547 The samples were dehydrated in graded ethanol solutions (75% to 100%) for 10 min  
548 each. The worms were embedded in low viscosity epoxy resin (modified Spurr's recipe)  
549 and then dried at 70°C overnight. Ultrathin sections (75 nm) were cut on a Reichert  
550 Ultracut E Ultramicrotome and then stained with 0.2% lead citrate. Reagents used were  
551 obtained from Electron Microscopy Services. Samples were visualized using a Hitachi  
552 HT7700 Transmission Electron Microscope at an accelerating voltage of 80 kV.

### 553 **Ruc-antigen fusion protein**

554 The Bma-LAD-2-*Renilla reniformis* luciferase (Ruc) construct was inserted into a  
555 pREN2 vector by Genscript. The predicted signal sequence was removed prior to gene  
556 synthesis. The vector was cloned into TOP10 cells (Thermofischer) and amplified on  
557 agarose plates with kanamycin 50 µg/mL. Plasmid DNA was isolated and purified using  
558 a Miniprep kit (Qiagen) per the manufacturer's guidelines. 293F cells (Thermofischer  
559 Scientific) were transfected with 30 µg of Bma-LAD-2 plasmid at a concentration of 1 x

560  $10^6$  cells per mL. The 293F cells were collected 72 hrs later and homogenized. The lysate  
561 was stored at  $-80^{\circ}\text{C}$  for later use.

## 562 **Luciferase immunoprecipitation system (LIPS)**

563 We employed the LIPS assay to measure antibody titers in serum from *W.*  
564 *bancrofti* infected patients [38-40]. In a 96-well polypropylene plate, serum was diluted to  
565 1:100 for IgG and 1:10 for IgE in 50  $\mu\text{L}$  of LIPS master mix (20 mM Tris pH 7.5, 150 mM  
566 NaCl, 5mM  $\text{MgCl}_2$ , 1% Triton X-100) with PBS-T added to bring the volume to 100  $\mu\text{L}$ .  
567 We added  $1 \times 10^6$  light units (LU) of the LAD-2-Ruc fusion protein to the mixture and  
568 incubated it at room temperature for 10 min. Purification of the antigen-antibody complex  
569 involved adding 5  $\mu\text{L}$  of a 50% suspension of Ultralink protein A/G (Pierce) or Ultralink  
570 anti-human IgE beads in PBS to a 96-well filter plate (Milipore) and then applying a  
571 vacuum. The serum mixture was then added and allowed to incubate for 15 minutes at  
572 room temperature. A vacuum was applied to the filter plate leaving only antigen-antibody  
573 complexed bound to beads in the wells. The samples were washed with 200  $\mu\text{L}$  of LIPS  
574 master mix twice and with PBS once. Using Bethold LB 960 Centro microplate  
575 luminometer, emitted LUs were measured after addition of 50  $\mu\text{L}$  of coelenterzine solution  
576 (Promega) to each sample well. The serum samples were run in duplicate, and the  
577 calculated LU was the emitted LU for only the LAD-2 fusion protein subtracted from the  
578 emitted LU for each sample.

## 579 **Serum Samples**

580 Serum samples used in this study were obtained under Institutional Review Board  
581 (IRB)-approved protocols from the Department of Transfusion Medicine (Clinical Center,

582 National Institutes of Health, Bethesda, MD) and from the Laboratory of Laboratory of  
583 Parasitic Diseases (NIAID, National Institutes of Health, Bethesda, MD). All donors  
584 provided written approved consent.

585

## 586 **Statistical analysis**

587 The siRNA experiments for Bma-LAD-2 were repeated twice under the same  
588 conditions. All other siRNA experiments were only performed once. The worm motility  
589 and Mf release data was analyzed by one-way analysis of variance (ANOVA) using the  
590 statistical package in PRISM 7.0. Validity of the one-way ANOVA was verified by  
591 performing individual comparisons of mean values using Tukey's multiple comparisons  
592 test. For the gene expression and MTT reduction data, a T-test was used to determine  
593 significance. The p values for each experimental and control group was designated as  
594 follows: \* for p values <0.05, \*\* for p values <0.01, and \*\*\* for p values <0.001.

## 595 **Discussion**

596 In this study, we sought to identify intestinal tract antigens of adult filarial  
597 nematodes that could potentially serve as therapeutic or vaccine targets. Even though  
598 Bma-LAD-2 is expressed in all lifecycle stages, we hypothesize that disruption of tight  
599 junctions formed within the intestinal tract of filariae will have a selective effect on the  
600 adult worm stages as microfilariae lack an intestinal tract [41]. Knockdown of the tight  
601 junction protein Bma-LAD-2 caused rapid reductions in worm motility, metabolism, and  
602 microfilaria release, which led to worm death. Electron microscopy demonstrated a loss  
603 of pseudocoelomic fluid, revealing that disruption of the tight junctions between epithelial

604 cells of the filarial intestinal tract could be a novel method to rapidly kill these worms by  
605 causing rapid dissolution of their hydrostatic skeleton.

606 Bma-LAD-2 is an immunoglobulin (Ig) intermediate-set (I-set) domain containing  
607 protein and, therefore, belongs to the functionally diverse Ig superfamily (IgSF). The Ig  
608 domain is the basic structural unit of the superfamily and consists of two sandwiched  
609 antiparallel beta sheets [42]. Proteins in the IgSF are classified based on the structure of  
610 their Ig domain and given a set designation of variable (V), constant 1 (C1), constant 2  
611 (C2), or intermediate (I) [43]. Ig I-set domains are similar to V-set domains but have a  
612 shorter distance between the invariant cysteine residues. Intropro analysis predicts that  
613 Bma-LAD-2 has 6 Ig domains spanning from amino acid position 24 to 602.

614 Based on homology to its ortholog in *C. elegans* (LAD-2, L1 adhesion), Bma-LAD-2  
615 is predicted to be an L1 cell adhesion molecule (L1CAM). L1CAMs are single  
616 transmembrane proteins that can participate in homophilic and heterophilic interactions  
617 [44]. The cytoplasmic tail of L1CAMs has multiple consensus-binding sites which allow  
618 for interaction with various cytoskeleton linkers proteins such as ankyrin, spectrin, and  
619 ERM [45, 46]. Furthermore, the cytoplasmic tail of L1CAMs has phosphorylation sites  
620 indicating a possible role in signal transduction [44, 47, 48].

621 Interestingly in *C. elegans*, LAD-2 is critical in guiding axon migration and does not  
622 appear to be critical for the establishment or maintenance of the intestinal epithelium [49,  
623 50]. However, LAD-1, another L1CAM, has been shown to co-localize with apical junction  
624 molecules. In nematodes, cell adhesion molecules (CAMs) assemble to form two major  
625 types of apical junctions: the cadherin catenin complex (CCC) and the DLG-1/AJM-1  
626 complex (DAC) [45, 50]. In *C. elegans*, it has been shown that that the CCC is not

627 essential for cell adhesion [51]. This is surprising given the critical role of cadherins in  
628 cellular adhesion for most other eukaryotes. Researchers have suggested that LAD-1  
629 may act as a redundant adhesion system thereby mitigating the loss of the CCC. Indeed,  
630 embryos expressing dominant-negative LAD-1 have altered cell morphology and position  
631 indicating a role in cellular adhesion [52-54]. In filarial nematodes, no such redundancy  
632 appears to exist as knockdown of Bma-LAD-2 resulted in dramatic phenotypic change.

633 Evidence also indicates that L1CAMs play an integral role in cell-to-cell contact  
634 signaling in the epithelial cells. In fact, loss of L1CAM signal can arrest cell proliferation  
635 and potentially induce apoptosis [55, 56]. This would explain the ablation of microvilli in  
636 the intestine of target specific siRNA-treated worms as well as the unraveling of the  
637 mitochondrial cristae. In addition, the loss of adhesion molecules may have hindered the  
638 ability of the apical junction to prevent diffusion of the internal pseudocoelomic fluid into  
639 the intestinal lumen. Loss of this fluid would have an adverse effect on worm vitality. The  
640 pseudocoelomic fluid generates a positive pressure within the pseudocoelom creating a  
641 hydrostatic skeleton thought to be necessary for maintaining cuticle rigidity. This allows  
642 the longitudinal musculature of the worm to contract against the cuticle creating the wave  
643 movement necessary for locomotion [41]. In addition, it believed that the fluid serves as  
644 lubricant for the tissues during this motile process as well as a medium for nutrient  
645 exchange and cellular signaling [57]. After an extensive search of the current literature,  
646 this loss of pseudocoelomic fluid appears to be a unique finding, and it most likely played  
647 a significant role in establishing the phenotype seen with Bma-LAD-2 knockdown.

648 In addition to disrupted anatomy, changes in the intestinal tract may have  
649 contributed to worm death by disrupting nutrient intake. While studies have shown that

650 *Brugia* worms can absorb some nutrients through their cuticle, [41, 58], a previous study  
651 of the rat filarial *Litomoisoides sigmooiditis* showed the presence of red blood cells in the  
652 filarial gut which implied that adult filariae actively feed [59]. Another study demonstrated  
653 that heartworms are able to ingest serum [60]. In addition, the proteomic analysis of  
654 different filarial tissue structures performed by our lab revealed that the filarial intestine is  
655 enriched in transporters, drug metabolizing enzymes, proteases, protease inhibitors, and  
656 adhesion molecules [22]. These findings suggest that the gut is used for not only nutrient  
657 digestion and uptake but also waste metabolism and disposal; functions essential in any  
658 living organism.

659         The loss of Bma-LAD-2 results in a different phenotype than what has been  
660 observed when the ortholog of this protein is knocked out in *C. elegans*. This could be  
661 due to a number of reasons. *C. elegans* constantly use their intestine for digestion and  
662 waste disposal, emptying their intestinal contents every 45 seconds [58, 61, 62].  
663 Additionally, *C. elegans* are unable to absorb nutrients across their thick cuticle, which  
664 leaves the intestine as the only means of nutrient absorption. Evolutionarily, it is  
665 reasonable that the systems in the intestine of *C. elegans* are redundant as failure in one  
666 could result in worm death. Indeed, we see evidence of this redundancy by the fact that  
667 knocking out the CCC does not dramatically disrupt cell adhesion in *C. elegans* [51]. In  
668 contrast, intestinal feeding by adult filariae may be more inconsistent as the parasites can  
669 absorb at least some nutrients through their cuticle [58, 62]. It is quite possible that  
670 helminths only use their intestine to digest essential proteins and macromolecules too  
671 large to be absorbed by the cuticle. Consequently, there may have been less evolutionary  
672 pressure to develop redundant systems in the intestine. Finally, *C. elegans* is a free-living

673 nematode, and therefore, has different digestive requirements than a parasitic nematode  
674 such as *Brugia*. This difference is no more apparent than with the number of protein-  
675 coding genes. *C. elegans* has 19,762 protein-coded genes compared to the predicted  
676 ~11,500 of *B. malayi* [26, 63].

677         When developing a helminth vaccine, there is a risk that the antigen could induce  
678 an allergic reaction in individuals previously exposed to filariae [21]. This has been a major  
679 impediment to the development of effective helminth vaccines. There is evidence to  
680 suggest that helminth intestinal proteins act as “hidden antigens,” which are proteins not  
681 exposed to the immune system during natural infection and thus would not elicit an IgE-  
682 response [16, 17, 21, 64, 65]. Furthermore, because these proteins are hidden from the  
683 immune system, there is little evolutionary pressure to develop mechanisms that enable  
684 these proteins to evade the immune system. This may leave these proteins vulnerable to  
685 attack by the host defenses [65]. A key limitation to development of vaccines against  
686 filarial nematodes is the possibility that endemic populations may be IgE-sensitized  
687 against the antigen and thus experience allergic reactions when vaccinated. In this study,  
688 we demonstrated that people infected with lymphatic filariasis do not appear to have  
689 detectable IgE antibodies against Bma-LAD-2, suggesting that this antigen may be safe  
690 to use as a vaccine. While this result is promising, more studies need to be performed  
691 using a larger sample size of endemic people to confirm these results.

692         In this study, we also evaluated 7 other *Brugia* intestinal proteins. Successful  
693 transcript knockdown was achieved for 3 of the targets. We attribute this failure rate to  
694 the well-documented difficulty of performing RNA interference in helminths [28, 29]. None  
695 of the other proteins that were successfully knocked down (Bma-Serpin, Bma-ShTK, and



696 Bma-Reprolysin) resulted in substantial changes to worm viability or fecundity. It is  
697 expected that not all intestinal proteins are essential for adult filaria survival. Interestingly,  
698 inhibiting expression of Bma-Reprolysin, a putative protease, did not result in a noticeable  
699 phenotype. This may be due to the fact that there are multiple proteases present in the  
700 gut and that knockdown of more than one is necessary to affect worm survival.

701 Finally, we suspect that any therapeutics or vaccines developed against Bma-LAD-  
702 2 would be effective against *W. bancrofti* and *B. timori* as well as *B. malayi* due to high  
703 overall relatedness between the filaria species. In addition, Bma-LAD-2 shares a high  
704 level of homology (75%) with other filarial species. Therefore, a therapeutic or vaccine  
705 developed against this protein may be protective against other filarial infections.

706 In conclusion, we demonstrated knockdown of Bma-LAD-2 expression in adult *B.*  
707 *malayi* by siRNA inhibition. This resulted in ablation of microvilli, shortened tight junctions,  
708 unraveling of the mitochondrial cristae, and loss of pseudocoelomic fluid as visualized by  
709 TEM. We believe that these structural changes in the intestinal epithelium led to decreased  
710 worm motility, metabolism, and Mf release in worms treated with Bma-LAD-2 siRNA.  
711 Therefore, we conclude that Bma-LAD-2 is an essential protein for adult worm survival.  
712 The lack of Bma-LAD-2-specific IgE suggests that this antigen would be a safe to use in  
713 a vaccine administered in endemic areas. In future studies we plan to evaluate Bma-LAD-  
714 2 as a vaccine candidate in animal models and as a potential therapeutic target for  
715 development of novel medications that specifically target adult filarial worms.

## 716 **Acknowledgements**

717 We thank Belinda Jackson (Uniformed Services University) and Laura Kropp for their  
718 assistance with the worm motility scoring.

## 719 **Funding Statement**

720 This work was supported by the Uniformed Services University (Grant# F173424117), the  
721 USU Center for Global Health Engagement (Grant# CGHE-73-8985), and by the Division  
722 of Intramural Research, National Institute of Allergy and Infectious Diseases, National  
723 Institutes of Health. The funders had no role in study design, data collection and analysis,  
724 decision to publish, or preparation of the manuscript.

## 725 **Competing Interests**

726 The authors have declared that no competing interests exist. Neither they nor their  
727 family members have a financial interest in any commercial product, service, or  
728 organization providing financial support for this research.

## 729 **Disclaimer**

730 The opinions and assertions expressed herein are those of the author(s) and do not necessarily  
731 reflect the official policy or position of the Uniformed Services University, the Department of  
732 Defense, or the Department of Health and Human Services.

733  
734 This work was prepared by military (AFF) and civilian (MEP, SB, TBN, EM) employees of the  
735 US Government as part of these individuals' official duties and therefore is in the public domain  
736 and does not possess copyright protection (*public domain information may be freely distributed*  
737 *and copied; however, as a courtesy it is requested that the Uniformed Services University and*  
738 *the authors be given an appropriate acknowledgement).*

## 739 **Data Availability**

740 All relevant data are within the paper and its Supporting Information files.



## 742 References

- 743 1. Ramaiah KD, Ottesen EA. Progress and impact of 13 years of the global programme to  
744 eliminate lymphatic filariasis on reducing the burden of filarial disease. *PLoS Negl Trop Dis.*  
745 2014;8(11):e3319. doi: 10.1371/journal.pntd.0003319. PubMed PMID: 25412180; PubMed  
746 Central PMCID: PMC4239120.
- 747 2. Evaluation IfHMa. Global Burden of Disease Study 2019 Results Tool Seattle,  
748 Washington: University of Washington; 2021 [cited 2021 June 19]. Available from:  
749 <http://ghdx.healthdata.org/gbd-results-tool>.
- 750 3. Global Programme to Eliminate Lymphatic Filariasis: World Health Organization; 2016  
751 [cited 2016 May 2]. Available from: [http://www.who.int/lymphatic\\_filariasis/disease/en/](http://www.who.int/lymphatic_filariasis/disease/en/).
- 752 4. WHO Team CoNTD. Ending the neglect to attain the Sustainable Development Goals: A  
753 road map for neglected tropical diseases 2021–2030. Overview. World Health Organization,  
754 2020 Contract No.: WHO/UCN/NTD/2020.01.
- 755 5. Hoerauf A, Pfarr K, Mand S, Debrah AY, Specht S. Filariasis in Africa--treatment  
756 challenges and prospects. *Clin Microbiol Infect.* 2011;17(7):977-85. Epub 2011/07/05. doi:  
757 10.1111/j.1469-0691.2011.03586.x. PubMed PMID: 21722251.
- 758 6. Rebollo MP, Bockarie MJ. Can Lymphatic Filariasis Be Eliminated by 2020? *Trends*  
759 *Parasitol.* 2017;33(2):83-92. doi: 10.1016/j.pt.2016.09.009. PubMed PMID: 27765440.
- 760 7. Bockarie MJ, Deb RM. Elimination of lymphatic filariasis: do we have the drugs to  
761 complete the job? *Curr Opin Infect Dis.* 2010;23(6):617-20. Epub 2010/09/18. doi:  
762 10.1097/QCO.0b013e32833fdee5. PubMed PMID: 20847694.
- 763 8. Thomsen EK, Sanuku N, Baea M, Satofan S, Maki E, Lombore B, et al. Efficacy, Safety,  
764 and Pharmacokinetics of Coadministered Diethylcarbamazine, Albendazole, and Ivermectin for  
765 Treatment of Bancroftian Filariasis. *Clin Infect Dis.* 2016;62(3):334-41. Epub 2015/10/22. doi:  
766 10.1093/cid/civ882. PubMed PMID: 26486704.
- 767 9. King CL, Suamani J, Sanuku N, Cheng YC, Satofan S, Mancuso B, et al. A Trial of a Triple-  
768 Drug Treatment for Lymphatic Filariasis. *N Engl J Med.* 2018;379(19):1801-10. Epub  
769 2018/11/08. doi: 10.1056/NEJMoa1706854. PubMed PMID: 30403937; PubMed Central PMCID:  
770 PMCPMC6194477.
- 771 10. Twum-Danso NA. Loa loa encephalopathy temporally related to ivermectin  
772 administration reported from onchocerciasis mass treatment programs from 1989 to 2001:  
773 implications for the future. *Filaria J.* 2003;2 Suppl 1:S7. Epub 2004/02/21. doi: 10.1186/1475-  
774 2883-2-S1-S7. PubMed PMID: 14975064; PubMed Central PMCID: PMCPMC2147656.
- 775 11. Wanji S, Eyong EJ, Tendongfor N, Ngwa CJ, Esuka EN, Kengne-Ouafo AJ, et al. Ivermectin  
776 treatment of Loa loa hyper-microfilaraemic baboons (*Papio anubis*): Assessment of microfilarial  
777 load reduction, haematological and biochemical parameters and histopathological changes  
778 following treatment. *PLoS Negl Trop Dis.* 2017;11(7):e0005576. Epub 2017/07/08. doi:  
779 10.1371/journal.pntd.0005576. PubMed PMID: 28686693; PubMed Central PMCID:  
780 PMCPMC5533442.
- 781 12. Albiez EJ, Newland HS, White AT, Kaiser A, Greene BM, Taylor HR, et al. Chemotherapy  
782 of onchocerciasis with high doses of diethylcarbamazine or a single dose of ivermectin:

- 783 microfilaria levels and side effects. *Trop Med Parasitol.* 1988;39(1):19-24. Epub 1988/03/01.  
784 PubMed PMID: 3291074.
- 785 13. Awadzi K, Gilles HM. Diethylcarbamazine in the treatment of patients with  
786 onchocerciasis. *Br J Clin Pharmacol.* 1992;34(4):281-8. Epub 1992/10/01. PubMed PMID:  
787 1457260; PubMed Central PMCID: PMCPMC1381407.
- 788 14. Bassetto CC, Silva BF, Newlands GF, Smith WD, Amarante AF. Protection of calves  
789 against *Haemonchus placei* and *Haemonchus contortus* after immunization with gut membrane  
790 proteins from *H. contortus*. *Parasite Immunol.* 2011;33(7):377-81. Epub 2011/05/04. doi:  
791 10.1111/j.1365-3024.2011.01295.x. PubMed PMID: 21535018.
- 792 15. Loukas A, Bethony JM, Williamson AL, Goud GN, Mendez S, Zhan B, et al. Vaccination of  
793 dogs with a recombinant cysteine protease from the intestine of canine hookworms diminishes  
794 the fecundity and growth of worms. *J Infect Dis.* 2004;189(10):1952-61. doi: 10.1086/386346.  
795 PubMed PMID: 15122534.
- 796 16. Pearson MS, Bethony JM, Pickering DA, de Oliveira LM, Jariwala A, Santiago H, et al. An  
797 enzymatically inactivated hemoglobinase from *Necator americanus* induces neutralizing  
798 antibodies against multiple hookworm species and protects dogs against heterologous  
799 hookworm infection. *FASEB J.* 2009;23(9):3007-19. doi: 10.1096/fj.09-131433. PubMed PMID:  
800 19380510; PubMed Central PMCID: PMC2735369.
- 801 17. Pearson MS, Pickering DA, Tribolet L, Cooper L, Mulvenna J, Oliveira LM, et al.  
802 Neutralizing antibodies to the hookworm hemoglobinase Na-APR-1: implications for a  
803 multivalent vaccine against hookworm infection and schistosomiasis. *J Infect Dis.*  
804 2010;201(10):1561-9. Epub 2010/04/07. doi: 10.1086/651953. PubMed PMID: 20367477.
- 805 18. Zhan B, Liu S, Perally S, Xue J, Fujiwara R, Brophy P, et al. Biochemical characterization  
806 and vaccine potential of a heme-binding glutathione transferase from the adult hookworm  
807 *Ancylostoma caninum*. *Infect Immun.* 2005;73(10):6903-11. doi: 10.1128/IAI.73.10.6903-  
808 6911.2005. PubMed PMID: 16177370; PubMed Central PMCID: PMC1230892.
- 809 19. Zhan B, Perally S, Brophy PM, Xue J, Goud G, Liu S, et al. Molecular cloning, biochemical  
810 characterization, and partial protective immunity of the heme-binding glutathione S-  
811 transferases from the human hookworm *Necator americanus*. *Infect Immun.* 2010;78(4):1552-  
812 63. Epub 2010/02/11. doi: 10.1128/IAI.00848-09. PubMed PMID: 20145100; PubMed Central  
813 PMCID: PMCPMC2849424.
- 814 20. Hotez PJ, Beaumier CM, Gillespie PM, Strych U, Hayward T, Bottazzi ME. Advancing a  
815 vaccine to prevent hookworm disease and anemia. *Vaccine.* 2016;34(26):3001-5. Epub  
816 2016/04/05. doi: 10.1016/j.vaccine.2016.03.078. PubMed PMID: 27040400.
- 817 21. Diemert DJ, Freire J, Valente V, Fraga CG, Talles F, Grahek S, et al. Safety and  
818 immunogenicity of the Na-GST-1 hookworm vaccine in Brazilian and American adults. *PLoS Negl*  
819 *Trop Dis.* 2017;11(5):e0005574. Epub 2017/05/04. doi: 10.1371/journal.pntd.0005574. PubMed  
820 PMID: 28464026; PubMed Central PMCID: PMCPMC5441635.
- 821 22. Morris CP, Bennuru S, Kropp LE, Zweben JA, Meng Z, Taylor RT, et al. A Proteomic  
822 Analysis of the Body Wall, Digestive Tract, and Reproductive Tract of *Brugia malayi*. *PLoS Negl*  
823 *Trop Dis.* 2015;9(9):e0004054. Epub 2015/09/15. doi: 10.1371/journal.pntd.0004054. PubMed  
824 PMID: 26367142; PubMed Central PMCID: PMCPMC4569401.
- 825 23. Flynn AF, Joyce MG, Taylor RT, Bennuru S, Lindrose AR, Sterling SL, et al. Intestinal UDP-  
826 glucuronosyltransferase as a potential target for the treatment and prevention of lymphatic

- 827 filariasis. *PLoS Negl Trop Dis*. 2019;13(9):e0007687. Epub 2019/09/13. doi:  
828 10.1371/journal.pntd.0007687. PubMed PMID: 31513587; PubMed Central PMCID:  
829 PMCPMC6742224.
- 830 24. Liu H, Focia PJ, He X. Homophilic adhesion mechanism of neurofascin, a member of the  
831 L1 family of neural cell adhesion molecules. *J Biol Chem*. 2011;286(1):797-805. Epub  
832 2010/11/05. doi: 10.1074/jbc.M110.180281. PubMed PMID: 21047790; PubMed Central  
833 PMCID: PMCPMC3013039.
- 834 25. Choi YJ, Ghedin E, Berriman M, McQuillan J, Holroyd N, Mayhew GF, et al. A deep  
835 sequencing approach to comparatively analyze the transcriptome of lifecycle stages of the  
836 filarial worm, *Brugia malayi*. *PLoS Negl Trop Dis*. 2011;5(12):e1409. Epub 2011/12/20. doi:  
837 10.1371/journal.pntd.0001409. PubMed PMID: 22180794; PubMed Central PMCID:  
838 PMCPMC3236722.
- 839 26. Bennuru S, Meng Z, Ribeiro JM, Semnani RT, Ghedin E, Chan K, et al. Stage-specific  
840 proteomic expression patterns of the human filarial parasite *Brugia malayi* and its  
841 endosymbiont *Wolbachia*. *Proc Natl Acad Sci U S A*. 2011;108(23):9649-54. Epub 2011/05/25.  
842 doi: 10.11481108 [pii]  
843 10.1073/pnas.1011481108. PubMed PMID: 21606368; PubMed Central PMCID: PMC3111283.
- 844 27. Diemert DJ, Pinto AG, Freire J, Jariwala A, Santiago H, Hamilton RG, et al. Generalized  
845 urticaria induced by the Na-ASP-2 hookworm vaccine: implications for the development of  
846 vaccines against helminths. *J Allergy Clin Immunol*. 2012;130(1):169-76 e6. doi:  
847 10.1016/j.jaci.2012.04.027. PubMed PMID: 22633322.
- 848 28. Dalzell JJ, Warnock ND, McVeigh P, Marks NJ, Mousley A, Atkinson L, et al. Considering  
849 RNAi experimental design in parasitic helminths. *Parasitology*. 2012;139(5):589-604. doi:  
850 10.1017/S0031182011001946. PubMed PMID: 22216952.
- 851 29. Ratnappan R, Vadnal J, Keaney M, Eleftherianos I, O'Halloran D, Hawdon JM. RNAi-  
852 mediated gene knockdown by microinjection in the model entomopathogenic nematode  
853 *Heterorhabditis bacteriophora*. *Parasit Vectors*. 2016;9:160. Epub 2016/03/20. doi:  
854 10.1186/s13071-016-1442-4. PubMed PMID: 26993791; PubMed Central PMCID:  
855 PMCPMC4797128.
- 856 30. Altschul SF, Madden TL, Schaffer AA, Zhang J, Zhang Z, Miller W, et al. Gapped BLAST  
857 and PSI-BLAST: a new generation of protein database search programs. *Nucleic Acids Res*.  
858 1997;25(17):3389-402. Epub 1997/09/01. PubMed PMID: 9254694; PubMed Central PMCID:  
859 PMCPMC146917.
- 860 31. Nikolaienko RM, Hammel M, Dubreuil V, Zalmai R, Hall DR, Mehzabeen N, et al.  
861 Structural Basis for Interactions Between Contactin Family Members and Protein-tyrosine  
862 Phosphatase Receptor Type G in Neural Tissues. *J Biol Chem*. 2016;291(41):21335-49. Epub  
863 2016/08/20. doi: 10.1074/jbc.M116.742163. PubMed PMID: 27539848; PubMed Central  
864 PMCID: PMCPMC5076805.
- 865 32. Vilstrup J, Simonsen A, Birkefeldt T, Strandbygard D, Lyngso J, Pedersen JS, et al. Crystal  
866 and solution structures of fragments of the human leucocyte common antigen-related protein.  
867 *Acta Crystallogr D Struct Biol*. 2020;76(Pt 5):406-17. Epub 2020/05/02. doi:  
868 10.1107/S2059798320003885. PubMed PMID: 32355037.

- 869 33. Aboobaker AA, Blaxter ML. Use of RNA interference to investigate gene function in the  
870 human filarial nematode parasite *Brugia malayi*. *Mol Biochem Parasitol*. 2003;129(1):41-51.  
871 Epub 2003/06/12. PubMed PMID: 12798505.
- 872 34. Kushwaha S, Singh PK, Shahab M, Pathak M, Bhattacharya SM. In vitro silencing of  
873 *Brugia malayi* trehalose-6-phosphate phosphatase impairs embryogenesis and in vivo  
874 development of infective larvae in jirds. *PLoS Negl Trop Dis*. 2012;6(8):e1770. Epub 2012/08/21.  
875 doi: 10.1371/journal.pntd.0001770. PubMed PMID: 22905273; PubMed Central PMCID:  
876 PMCPMC3419221.
- 877 35. Misra S, Gupta J, Misra-Bhattacharya S. RNA interference mediated knockdown of  
878 *Brugia malayi* UDP-Galactopyranose mutase severely affects parasite viability, embryogenesis  
879 and in vivo development of infective larvae. *Parasit Vectors*. 2017;10(1):34. Epub 2017/01/21.  
880 doi: 10.1186/s13071-017-1967-1. PubMed PMID: 28103957; PubMed Central PMCID:  
881 PMCPMC5244609.
- 882 36. Singh PK, Kushwaha S, Mohd S, Pathak M, Misra-Bhattacharya S. In vitro gene silencing  
883 of independent phosphoglycerate mutase (iPGM) in the filarial parasite *Brugia malayi*. *Infect Dis*  
884 *Poverty*. 2013;2(1):5. Epub 2013/07/16. doi: 10.1186/2049-9957-2-5. PubMed PMID:  
885 23849829; PubMed Central PMCID: PMCPMC3707094.
- 886 37. Comley JC, Rees MJ, Turner CH, Jenkins DC. Colorimetric quantitation of filarial viability.  
887 *Int J Parasitol*. 1989;19(1):77-83. PubMed PMID: 2707965.
- 888 38. Burbelo PD, Goldman R, Mattson TL. A simplified immunoprecipitation method for  
889 quantitatively measuring antibody responses in clinical sera samples by using mammalian-  
890 produced Renilla luciferase-antigen fusion proteins. *BMC Biotechnol*. 2005;5:22. Epub  
891 2005/08/20. doi: 10.1186/1472-6750-5-22. PubMed PMID: 16109166; PubMed Central PMCID:  
892 PMCPMC1208859.
- 893 39. Burbelo PD, Ramanathan R, Klion AD, Iadarola MJ, Nutman TB. Rapid, novel, specific,  
894 high-throughput assay for diagnosis of *Loa loa* infection. *J Clin Microbiol*. 2008;46(7):2298-304.  
895 Epub 2008/05/30. doi: 10.1128/JCM.00490-08. PubMed PMID: 18508942; PubMed Central  
896 PMCID: PMCPMC2446928.
- 897 40. Drame PM, Meng Z, Bennuru S, Herrick JA, Veenstra TD, Nutman TB. Identification and  
898 Validation of *Loa loa* Microfilaria-Specific Biomarkers: a Rational Design Approach Using  
899 Proteomics and Novel Immunoassays. *MBio*. 2016;7(1):e02132-15. Epub 2016/02/18. doi:  
900 10.1128/mBio.02132-15. PubMed PMID: 26884435; PubMed Central PMCID:  
901 PMCPMC4791851.
- 902 41. Scott AL. Lymphatic-dwelling filariae. In: Nutman T, editor. *Lymphatic Filariasis*. London:  
903 Imperial College Press; 2000. p. 5-39.
- 904 42. Buck CA. Immunoglobulin superfamily: Structure, function and relationship to other  
905 receptor molecules. *Seminars in Cell Biology*. 1992;3(3):179-88. doi:  
906 [http://dx.doi.org/10.1016/S1043-4682\(10\)80014-5](http://dx.doi.org/10.1016/S1043-4682(10)80014-5).
- 907 43. Smith DK, Xue H. Sequence profiles of immunoglobulin and immunoglobulin-like  
908 domains. *Journal of molecular biology*. 1997;274(4):530-45. doi: 10.1006/jmbi.1997.1432.  
909 PubMed PMID: 9417933.
- 910 44. Kiefel H, Bondong S, Hazin J, Ridinger J, Schirmer U, Riedle S, et al. L1CAM: a major  
911 driver for tumor cell invasion and motility. *Cell Adh Migr*. 2012;6(4):374-84. Epub 2012/07/17.

- 912 doi: 10.4161/cam.20832. PubMed PMID: 22796939; PubMed Central PMCID:  
913 PMCPMC3478260.
- 914 45. Hartsock A, Nelson WJ. Adherens and tight junctions: structure, function and  
915 connections to the actin cytoskeleton. *Biochim Biophys Acta*. 2008;1778(3):660-9. doi:  
916 10.1016/j.bbamem.2007.07.012. PubMed PMID: 17854762; PubMed Central PMCID:  
917 PMC2682436.
- 918 46. Takahashi K, Nakanishi H, Miyahara M, Mandai K, Satoh K, Satoh A, et al. Nectin/PRR: An  
919 Immunoglobulin-like Cell Adhesion Molecule Recruited to Cadherin-based Adherens Junctions  
920 through Interaction with Afadin, a PDZ Domain-containing Protein. *The Journal of Cell Biology*.  
921 1999;145(3):539-49. PubMed PMID: PMC2185068.
- 922 47. Chen L, Zhou S. "CRASH"ing with the worm: insights into L1CAM functions and  
923 mechanisms. *Dev Dyn*. 2010;239(5):1490-501. Epub 2010/03/13. doi: 10.1002/dvdy.22269.  
924 PubMed PMID: 20225255; PubMed Central PMCID: PMCPMC3428060.
- 925 48. Hoffmann M, Segbert C, Helbig G, Bossinger O. Intestinal tube formation in  
926 *Caenorhabditis elegans* requires vang-1 and egl-15 signaling. *Dev Biol*. 2010;339(2):268-79.  
927 Epub 2009/12/17. doi: 10.1016/j.ydbio.2009.12.002. PubMed PMID: 20004187.
- 928 49. Wang X, Zhang W, Cheever T, Schwarz V, Opperman K, Hutter H, et al. The *C. elegans*  
929 L1CAM homologue LAD-2 functions as a coreceptor in MAB-20/Sema2 mediated axon guidance.  
930 *J Cell Biol*. 2008;180(1):233-46. Epub 2008/01/16. doi: 10.1083/jcb.200704178. PubMed PMID:  
931 18195110; PubMed Central PMCID: PMCPMC2213605.
- 932 50. Lynch AM, Hardin J. The assembly and maintenance of epithelial junctions in *C. elegans*.  
933 *Front Biosci (Landmark Ed)*. 2009;14:1414-32. Epub 2009/03/11. PubMed PMID: 19273138;  
934 PubMed Central PMCID: PMCPMC2896272.
- 935 51. Costa M, Raich W, Agbunag C, Leung B, Hardin J, Priess JR. A putative catenin-cadherin  
936 system mediates morphogenesis of the *Caenorhabditis elegans* embryo. *J Cell Biol*.  
937 1998;141(1):297-308. Epub 1998/05/16. PubMed PMID: 9531567; PubMed Central PMCID:  
938 PMCPMC2132712.
- 939 52. Wang X, Kweon J, Larson S, Chen L. A role for the *C. elegans* L1CAM homologue lad-  
940 1/sax-7 in maintaining tissue attachment. *Dev Biol*. 2005;284(2):273-91. Epub 2005/07/19. doi:  
941 10.1016/j.ydbio.2005.05.020. PubMed PMID: 16023097.
- 942 53. Dubreuil RR. Functional links between membrane transport and the spectrin  
943 cytoskeleton. *J Membr Biol*. 2006;211(3):151-61. Epub 2006/11/09. doi: 10.1007/s00232-006-  
944 0863-y. PubMed PMID: 17091212.
- 945 54. Weiss EE, Kroemker M, Rudiger AH, Jockusch BM, Rudiger M. Vinculin is part of the  
946 cadherin-catenin junctional complex: complex formation between alpha-catenin and vinculin. *J*  
947 *Cell Biol*. 1998;141(3):755-64. Epub 1998/06/13. PubMed PMID: 9566974; PubMed Central  
948 PMCID: PMCPMC2132754.
- 949 55. Ben Q, An W, Fei J, Xu M, Li G, Li Z, et al. Downregulation of L1CAM inhibits  
950 proliferation, invasion and arrests cell cycle progression in pancreatic cancer cells in vitro. *Exp*  
951 *Ther Med*. 2014;7(4):785-90. Epub 2014/03/25. doi: 10.3892/etm.2014.1519. PubMed PMID:  
952 24660028; PubMed Central PMCID: PMCPMC3961134.
- 953 56. Schafer H, Struck B, Feldmann EM, Bergmann F, Grage-Griebenow E, Geismann C, et al.  
954 TGF-beta1-dependent L1CAM expression has an essential role in macrophage-induced



- 955 apoptosis resistance and cell migration of human intestinal epithelial cells. *Oncogene*.  
956 2013;32(2):180-9. Epub 2012/02/22. doi: 10.1038/onc.2012.44. PubMed PMID: 22349829.
- 957 57. Basyoni MM, Rizk EM. Nematodes ultrastructure: complex systems and processes. *J*  
958 *Parasit Dis*. 2016;40(4):1130-40. Epub 2016/11/24. doi: 10.1007/s12639-015-0707-8. PubMed  
959 PMID: 27876901; PubMed Central PMCID: PMC5118333.
- 960 58. Lee DL. *The biology of nematodes*. London: Taylor & Francis; 2002. xii, 635 p. p.
- 961 59. Attout T, Babayan S, Hoerauf A, Taylor DW, Kozek WJ, Martin C, et al. Blood-feeding in  
962 the young adult filarial worms *Litomosoides sigmodontis*. *Parasitology*. 2005;130(Pt 4):421-8.  
963 PubMed PMID: 15830816.
- 964 60. McGonigle S, Yoho ER, James ER. Immunisation of mice with fractions derived from the  
965 intestines of *Dirofilaria immitis*. *Int J Parasitol*. 2001;31(13):1459-66. PubMed PMID: 11595233.
- 966 61. Avery L, You YJ. *C. elegans* feeding: The *C. elegans* Research Community; 2012.  
967 *WormBook*: [Available from: <http://www.wormbook.org>.
- 968 62. Munn EA, Munn PD. Feeding and Digestion. In: Lee DL, editor. *The Biology of*  
969 *Nematodes*. London: Taylor & Francis; 2002. p. p. 211–33.
- 970 63. Scott AL, Ghedin E. The genome of *Brugia malayi* - all worms are not created equal.  
971 *Parasitol Int*. 2009;58(1):6-11. Epub 2008/10/28. doi: S1383-5769(08)00097-4 [pii]  
972 10.1016/j.parint.2008.09.003. PubMed PMID: 18952001; PubMed Central PMCID:  
973 PMC2668601.
- 974 64. Newton SE, Morrish LE, Martin PJ, Montague PE, Rolph TP. Protection against multiply  
975 drug-resistant and geographically distant strains of *Haemonchus contortus* by vaccination with  
976 H11, a gut membrane-derived protective antigen. *Int J Parasitol*. 1995;25(4):511-21. Epub  
977 1995/04/01. PubMed PMID: 7635627.
- 978 65. Munn EA. Rational design of nematode vaccines: hidden antigens. *Int J Parasitol*.  
979 1997;27(4):359-66. Epub 1997/04/01. PubMed PMID: 9184927.
- 980

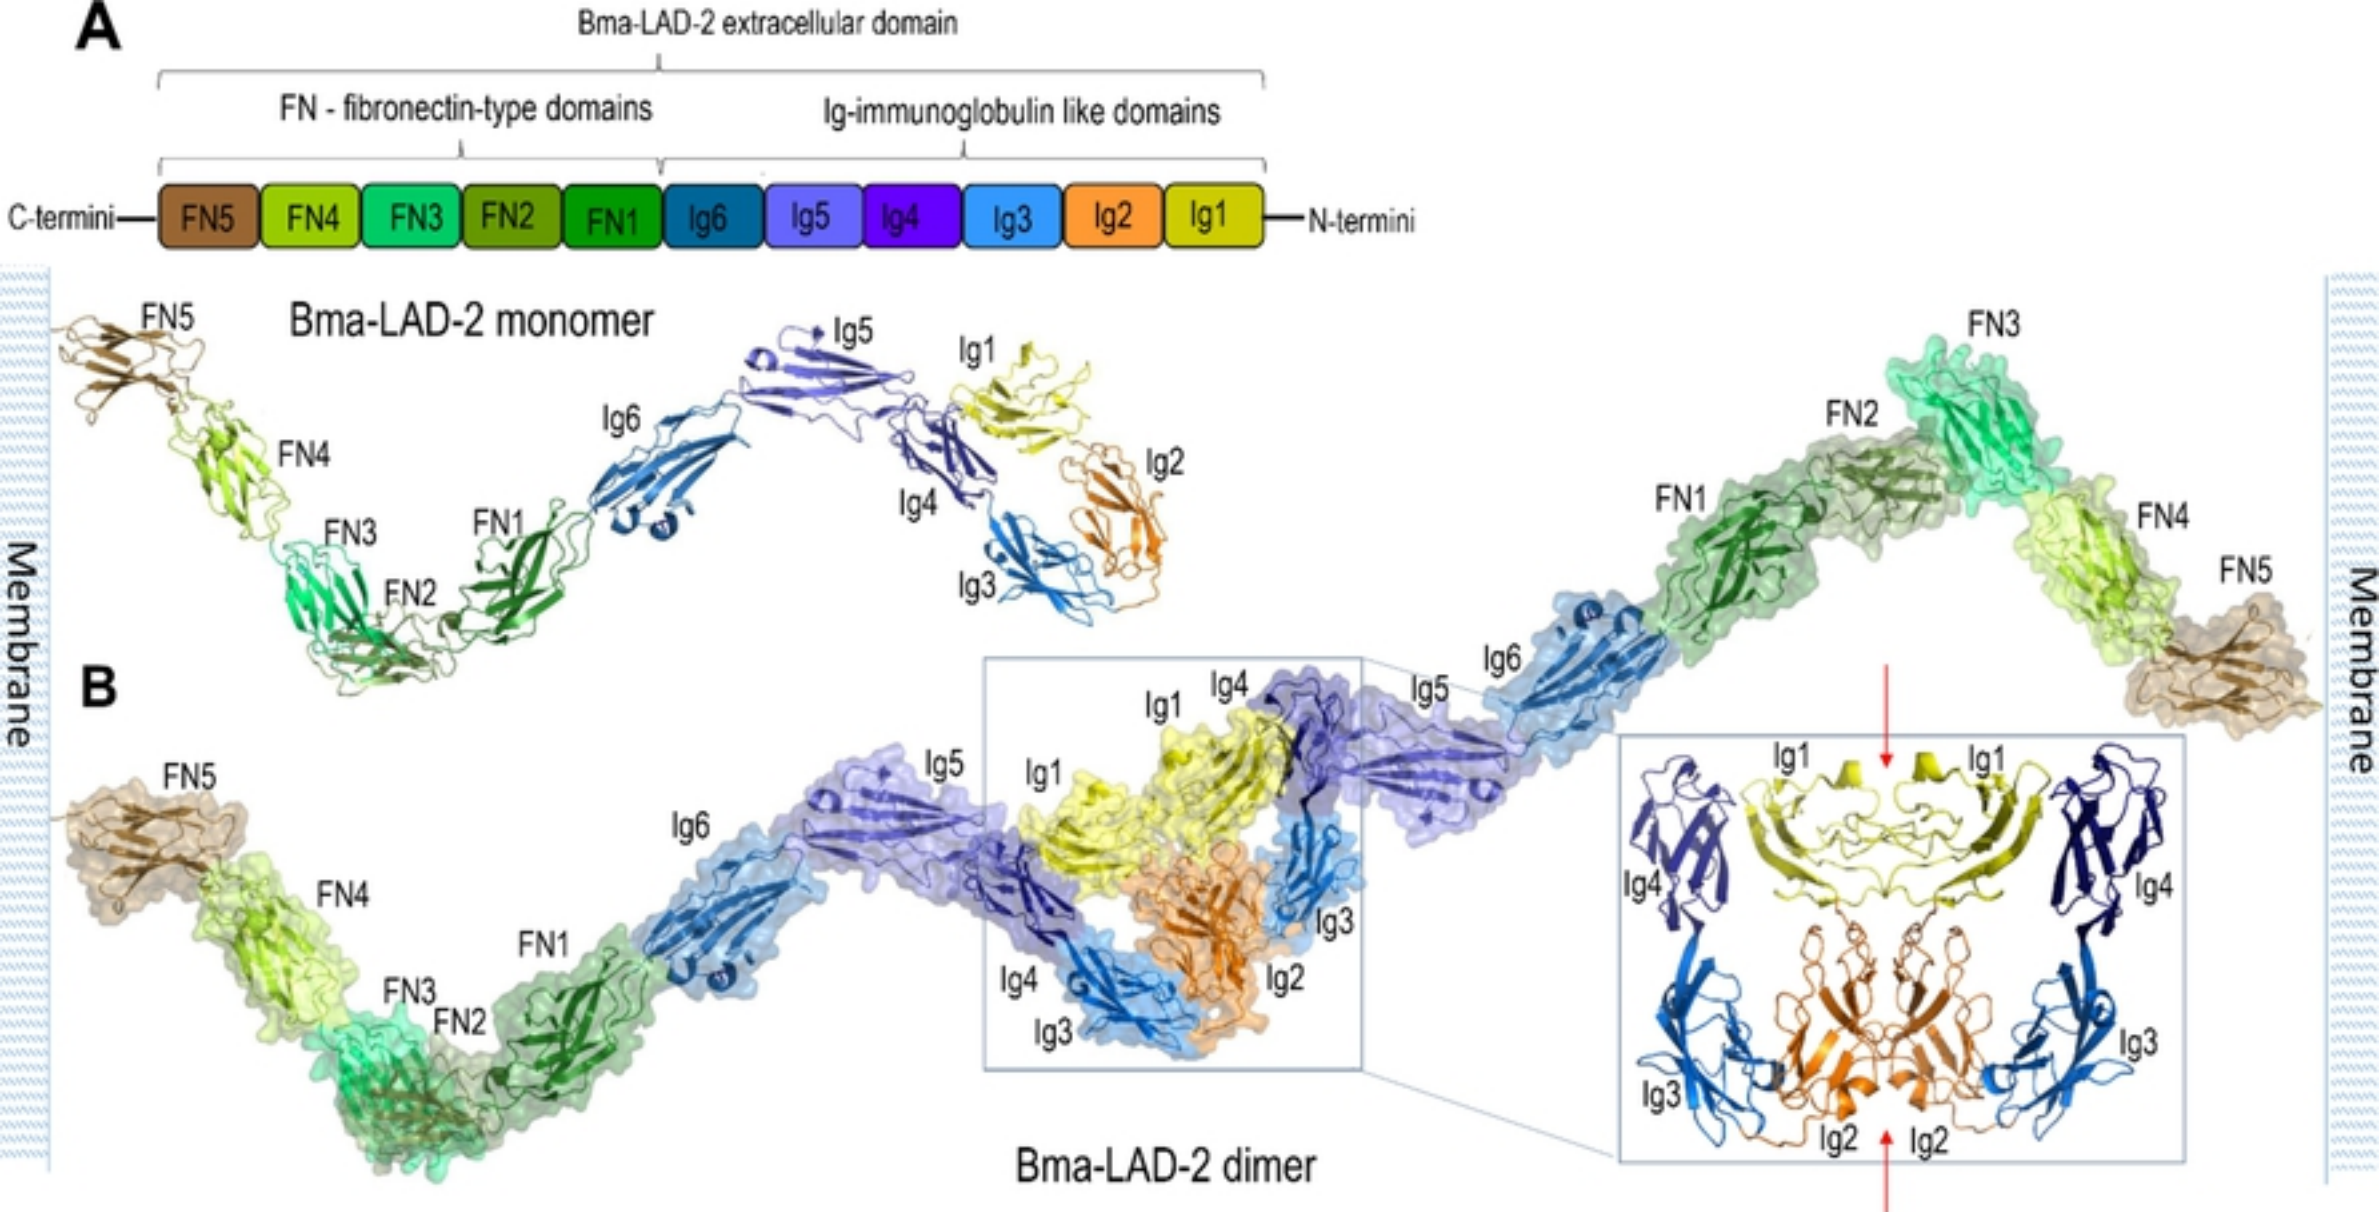

Fig 1

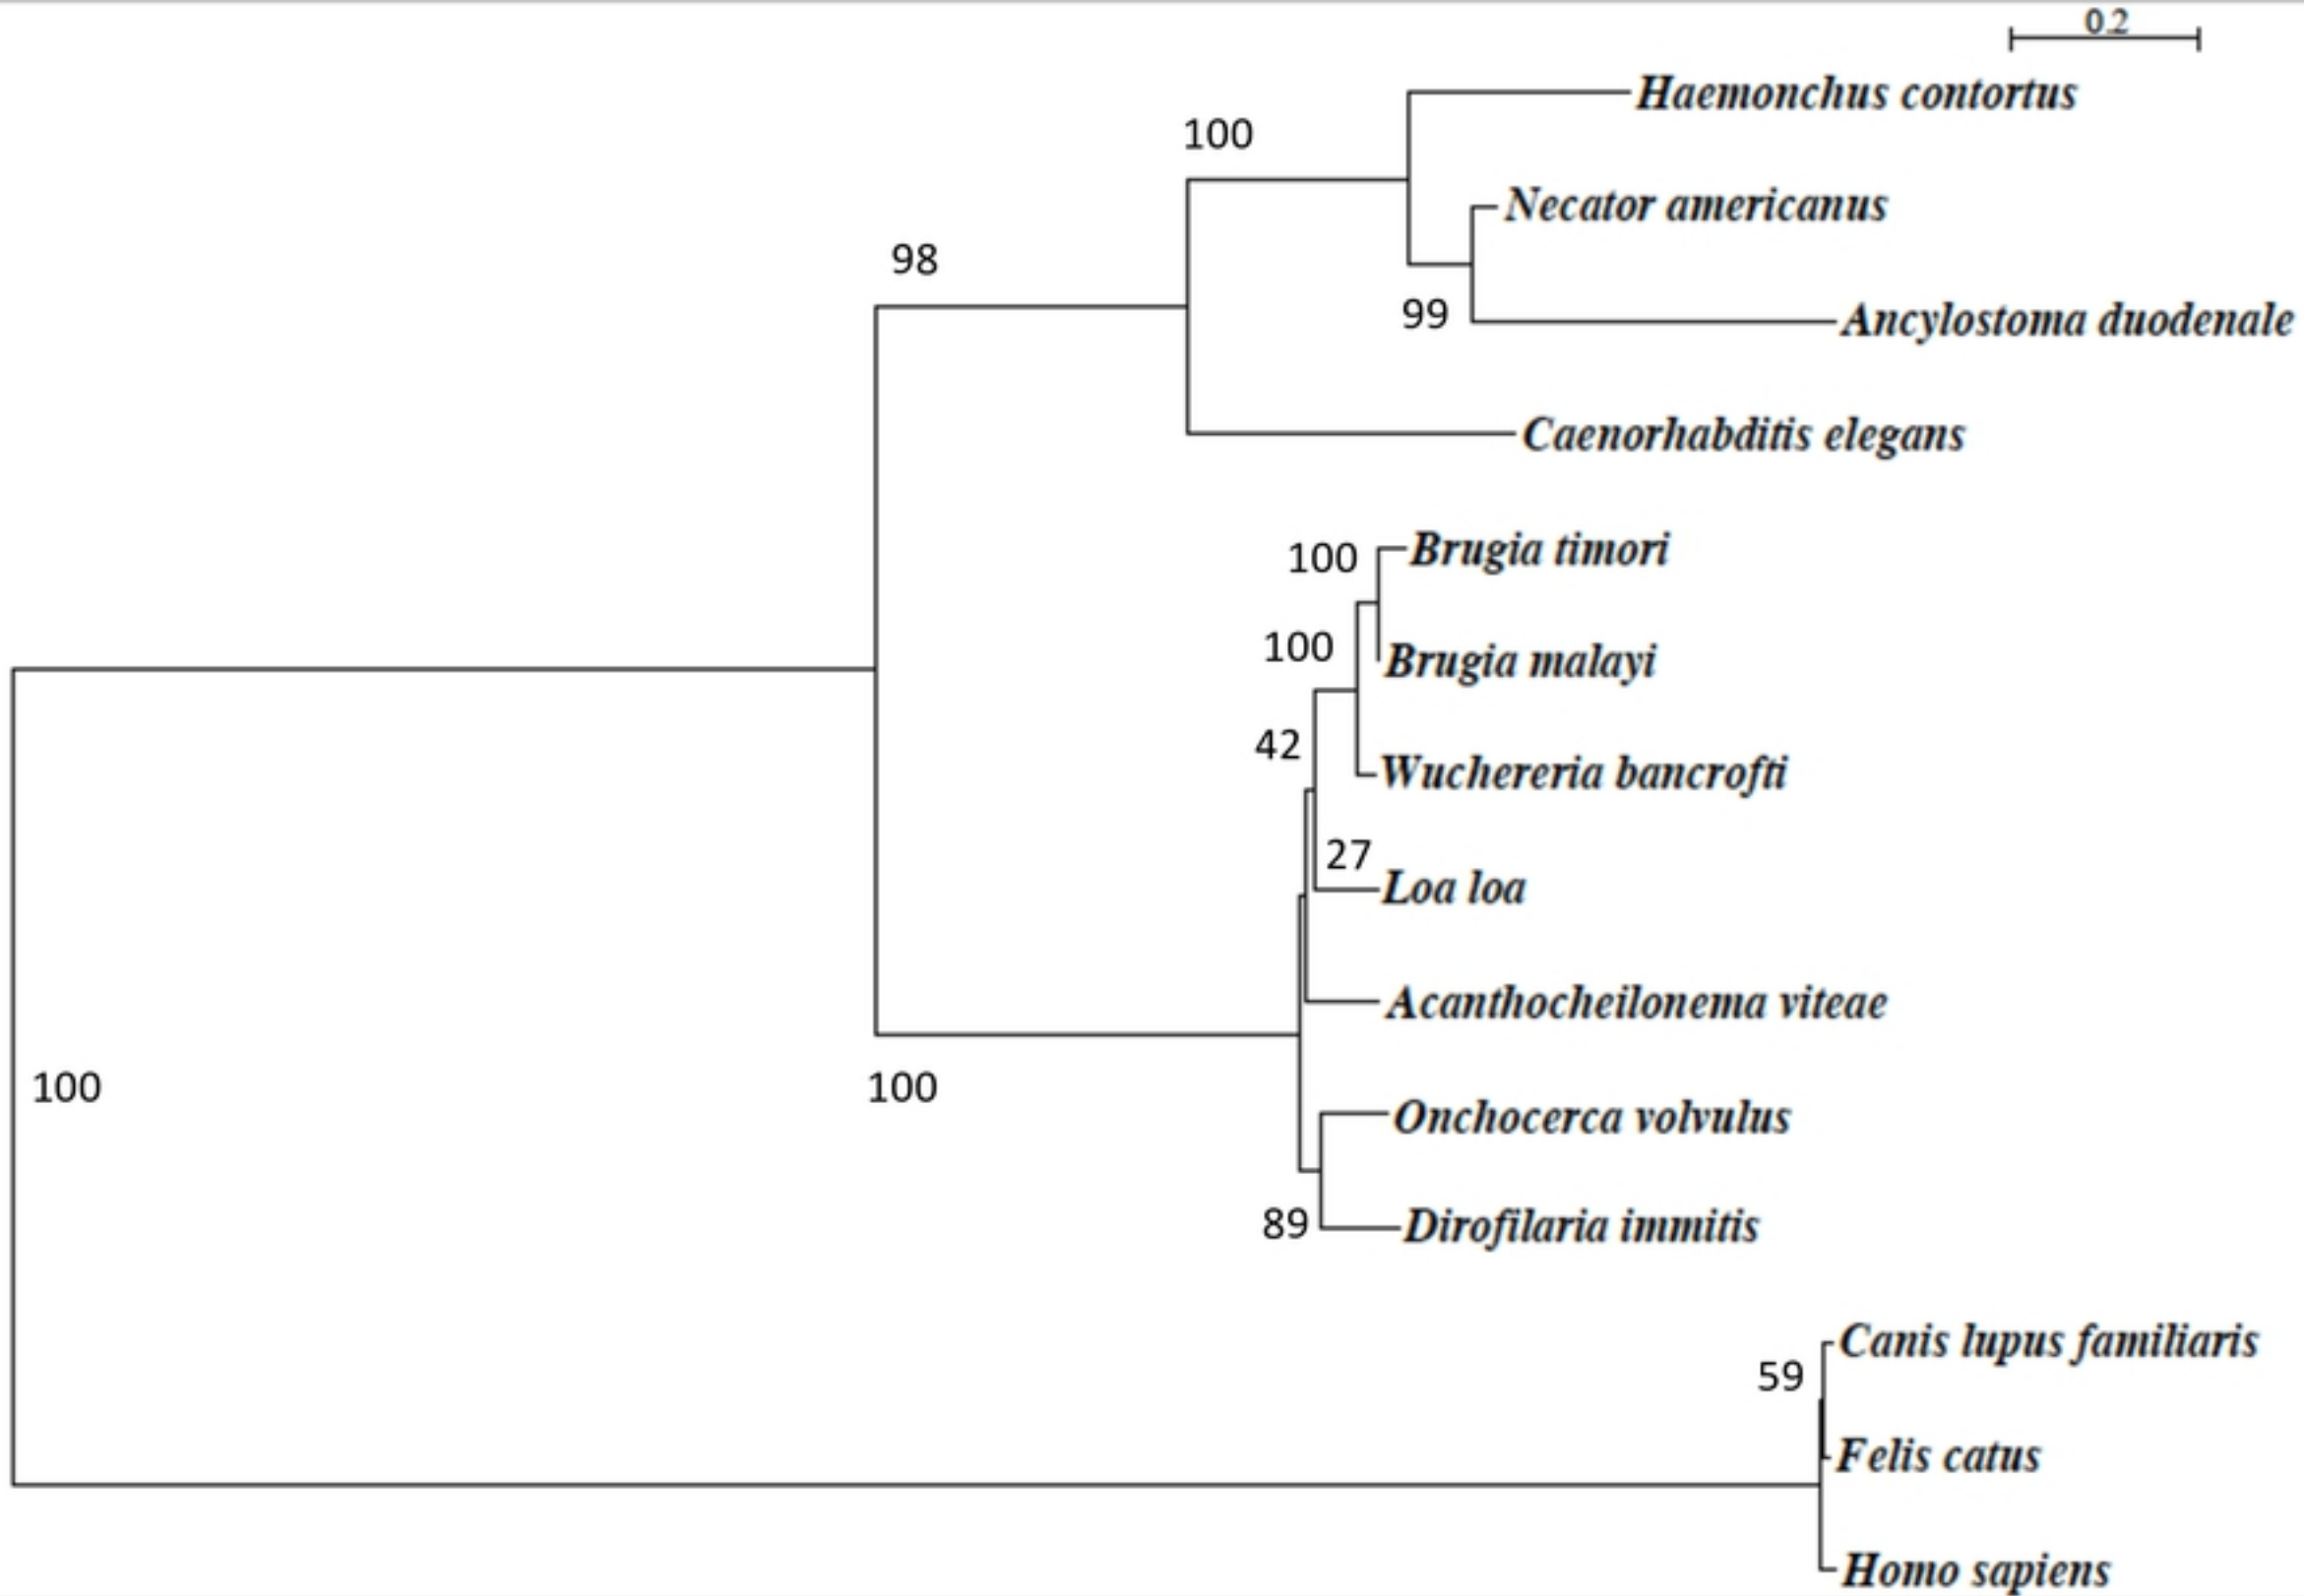

Fig 2

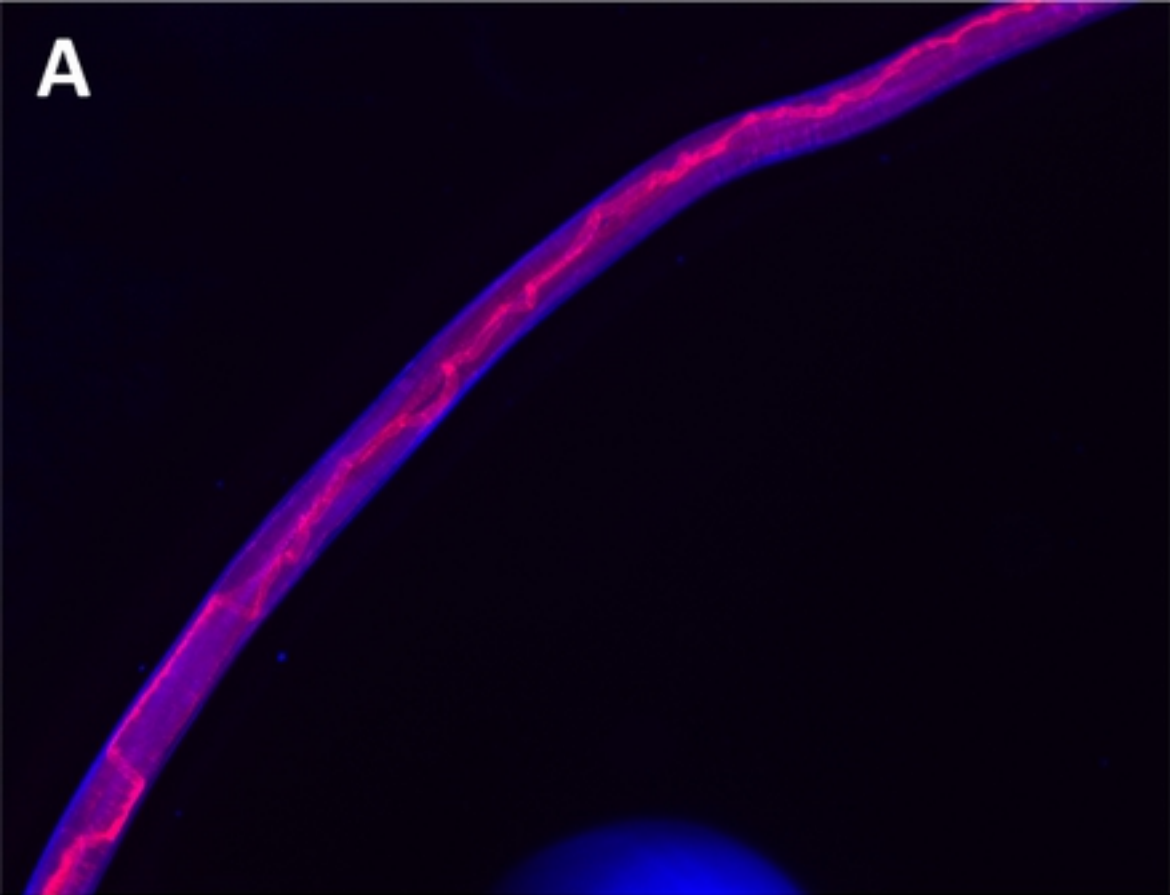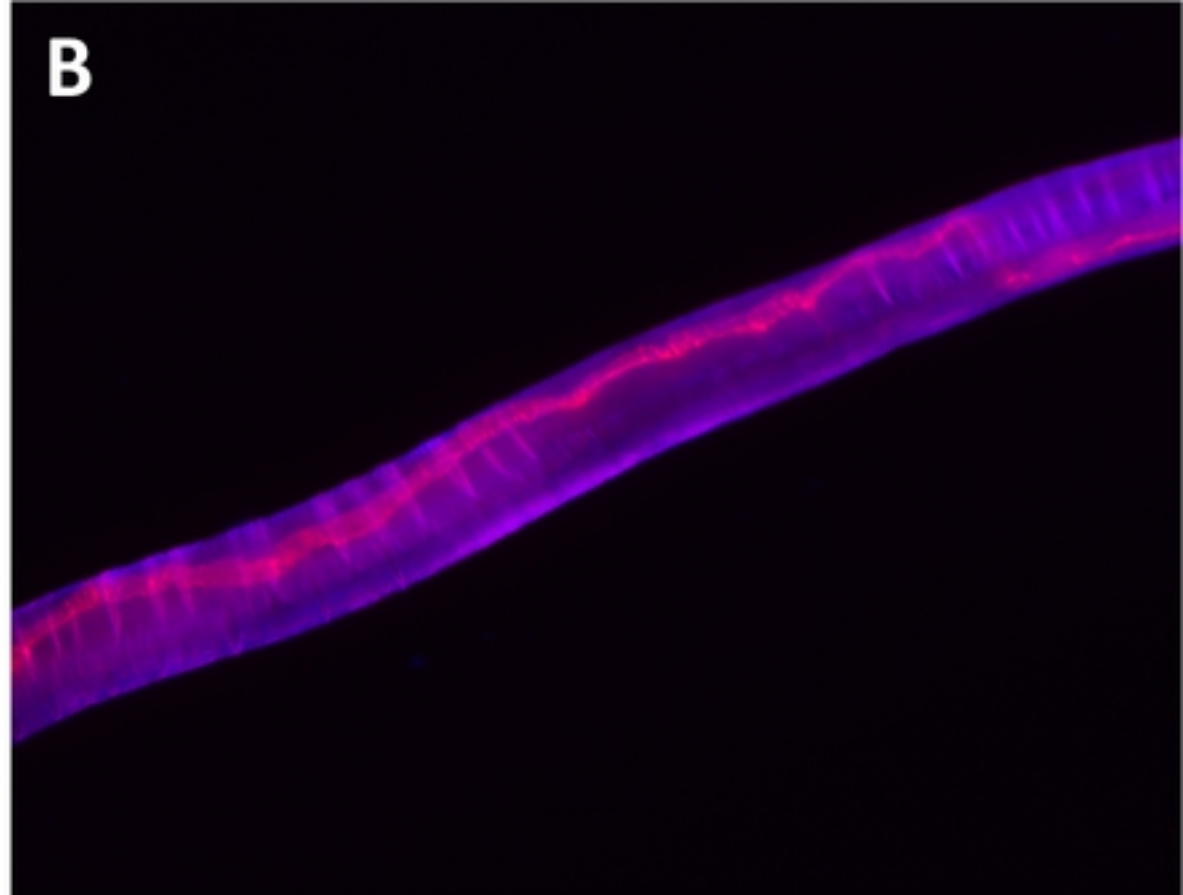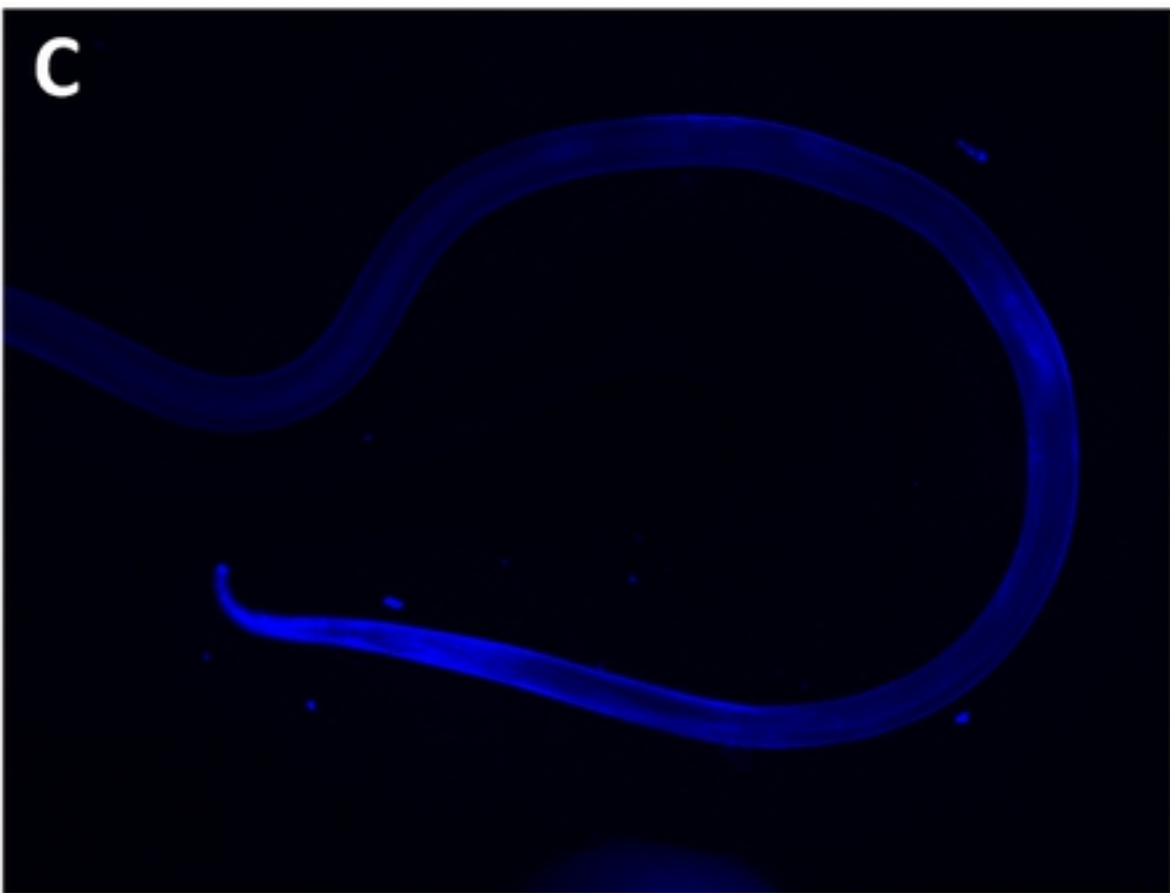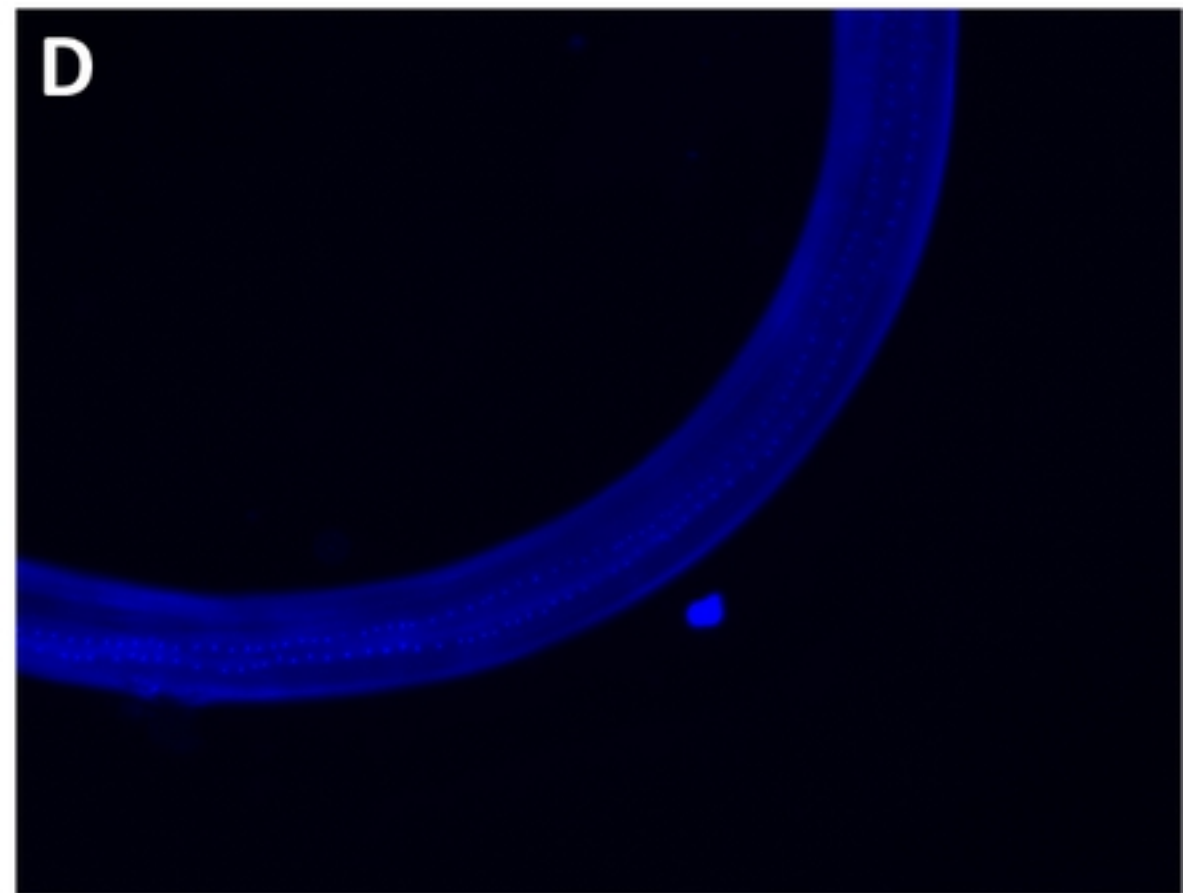

Fig 3

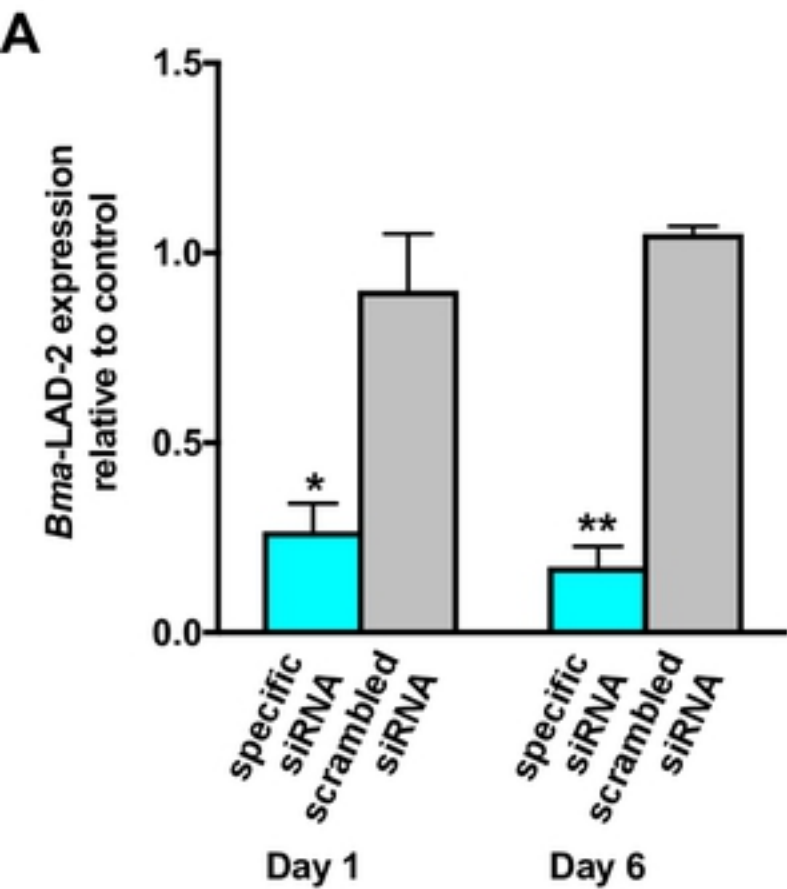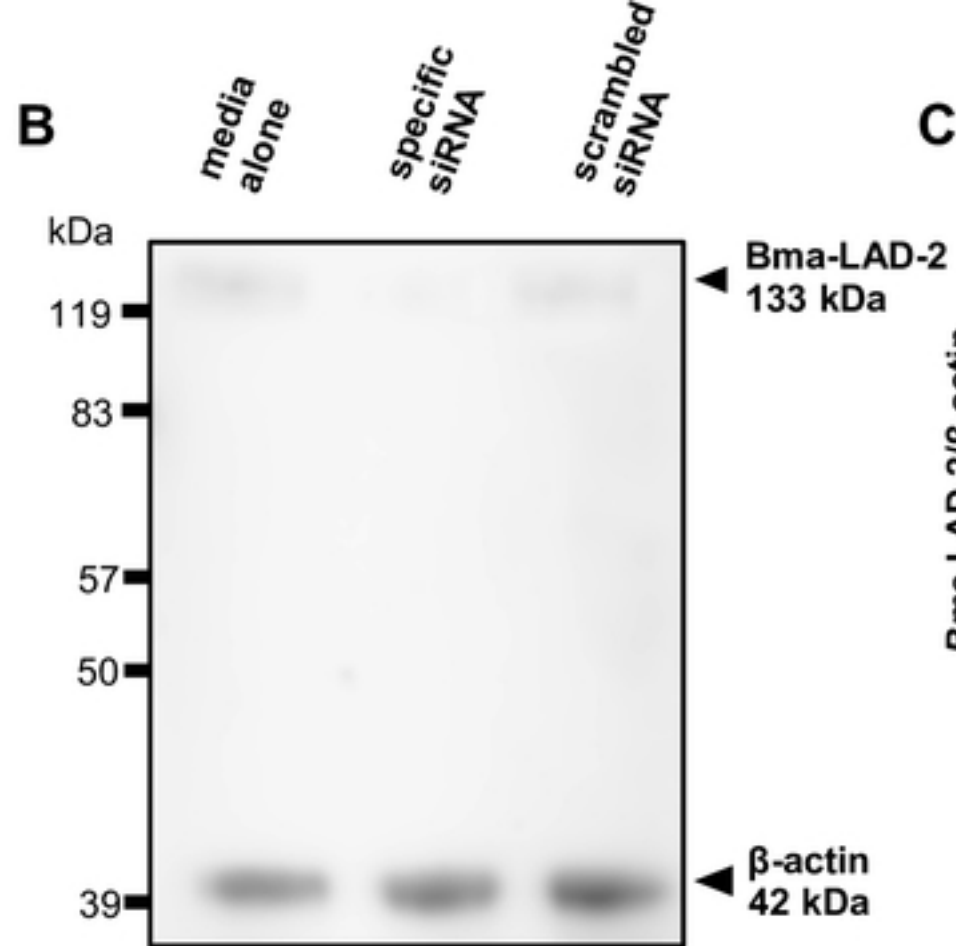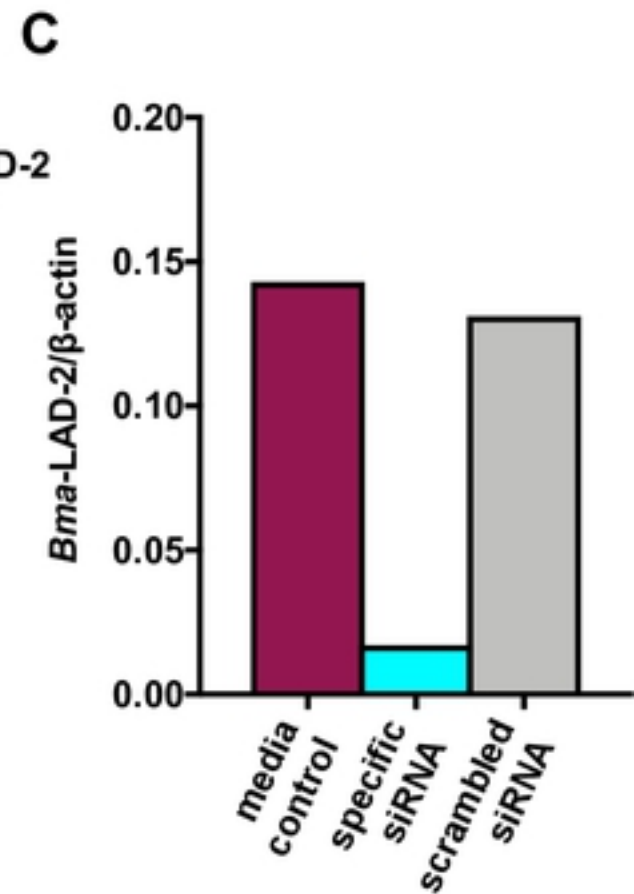

Fig 4

A

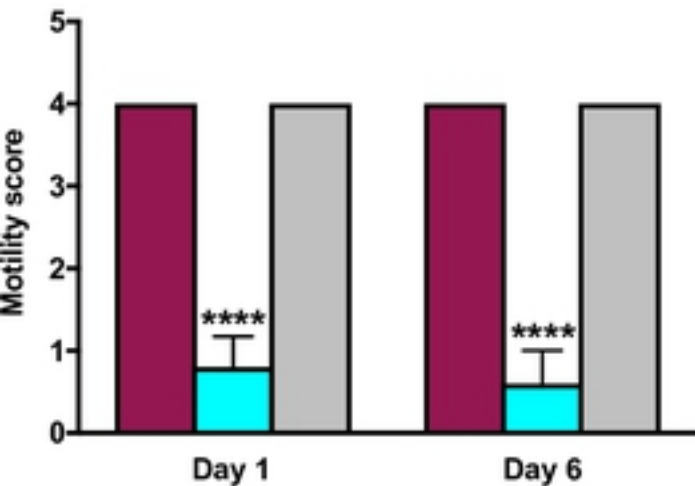

B

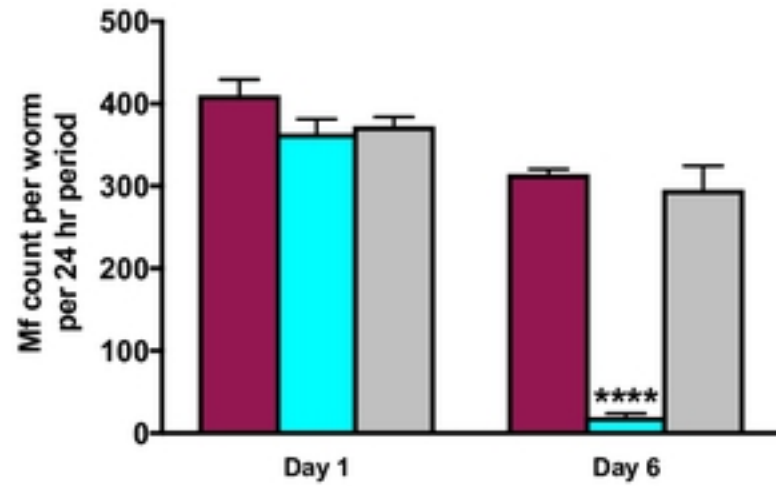

C

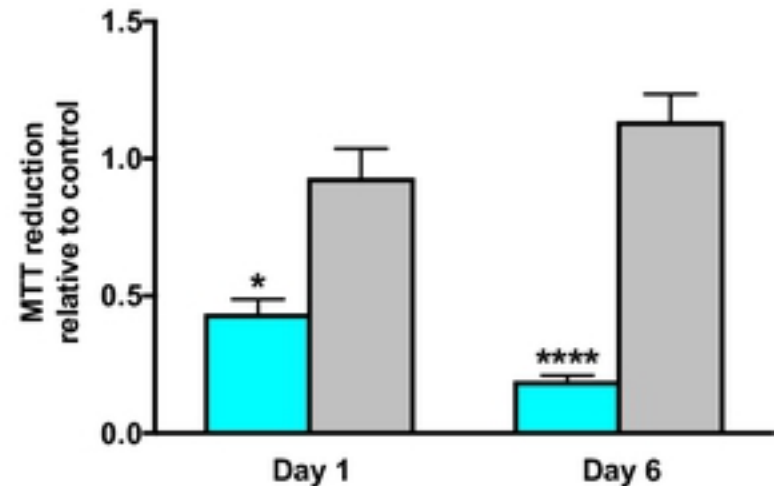

■ media control    ■ specific siRNA    ■ scrambled siRNA

Fig 5

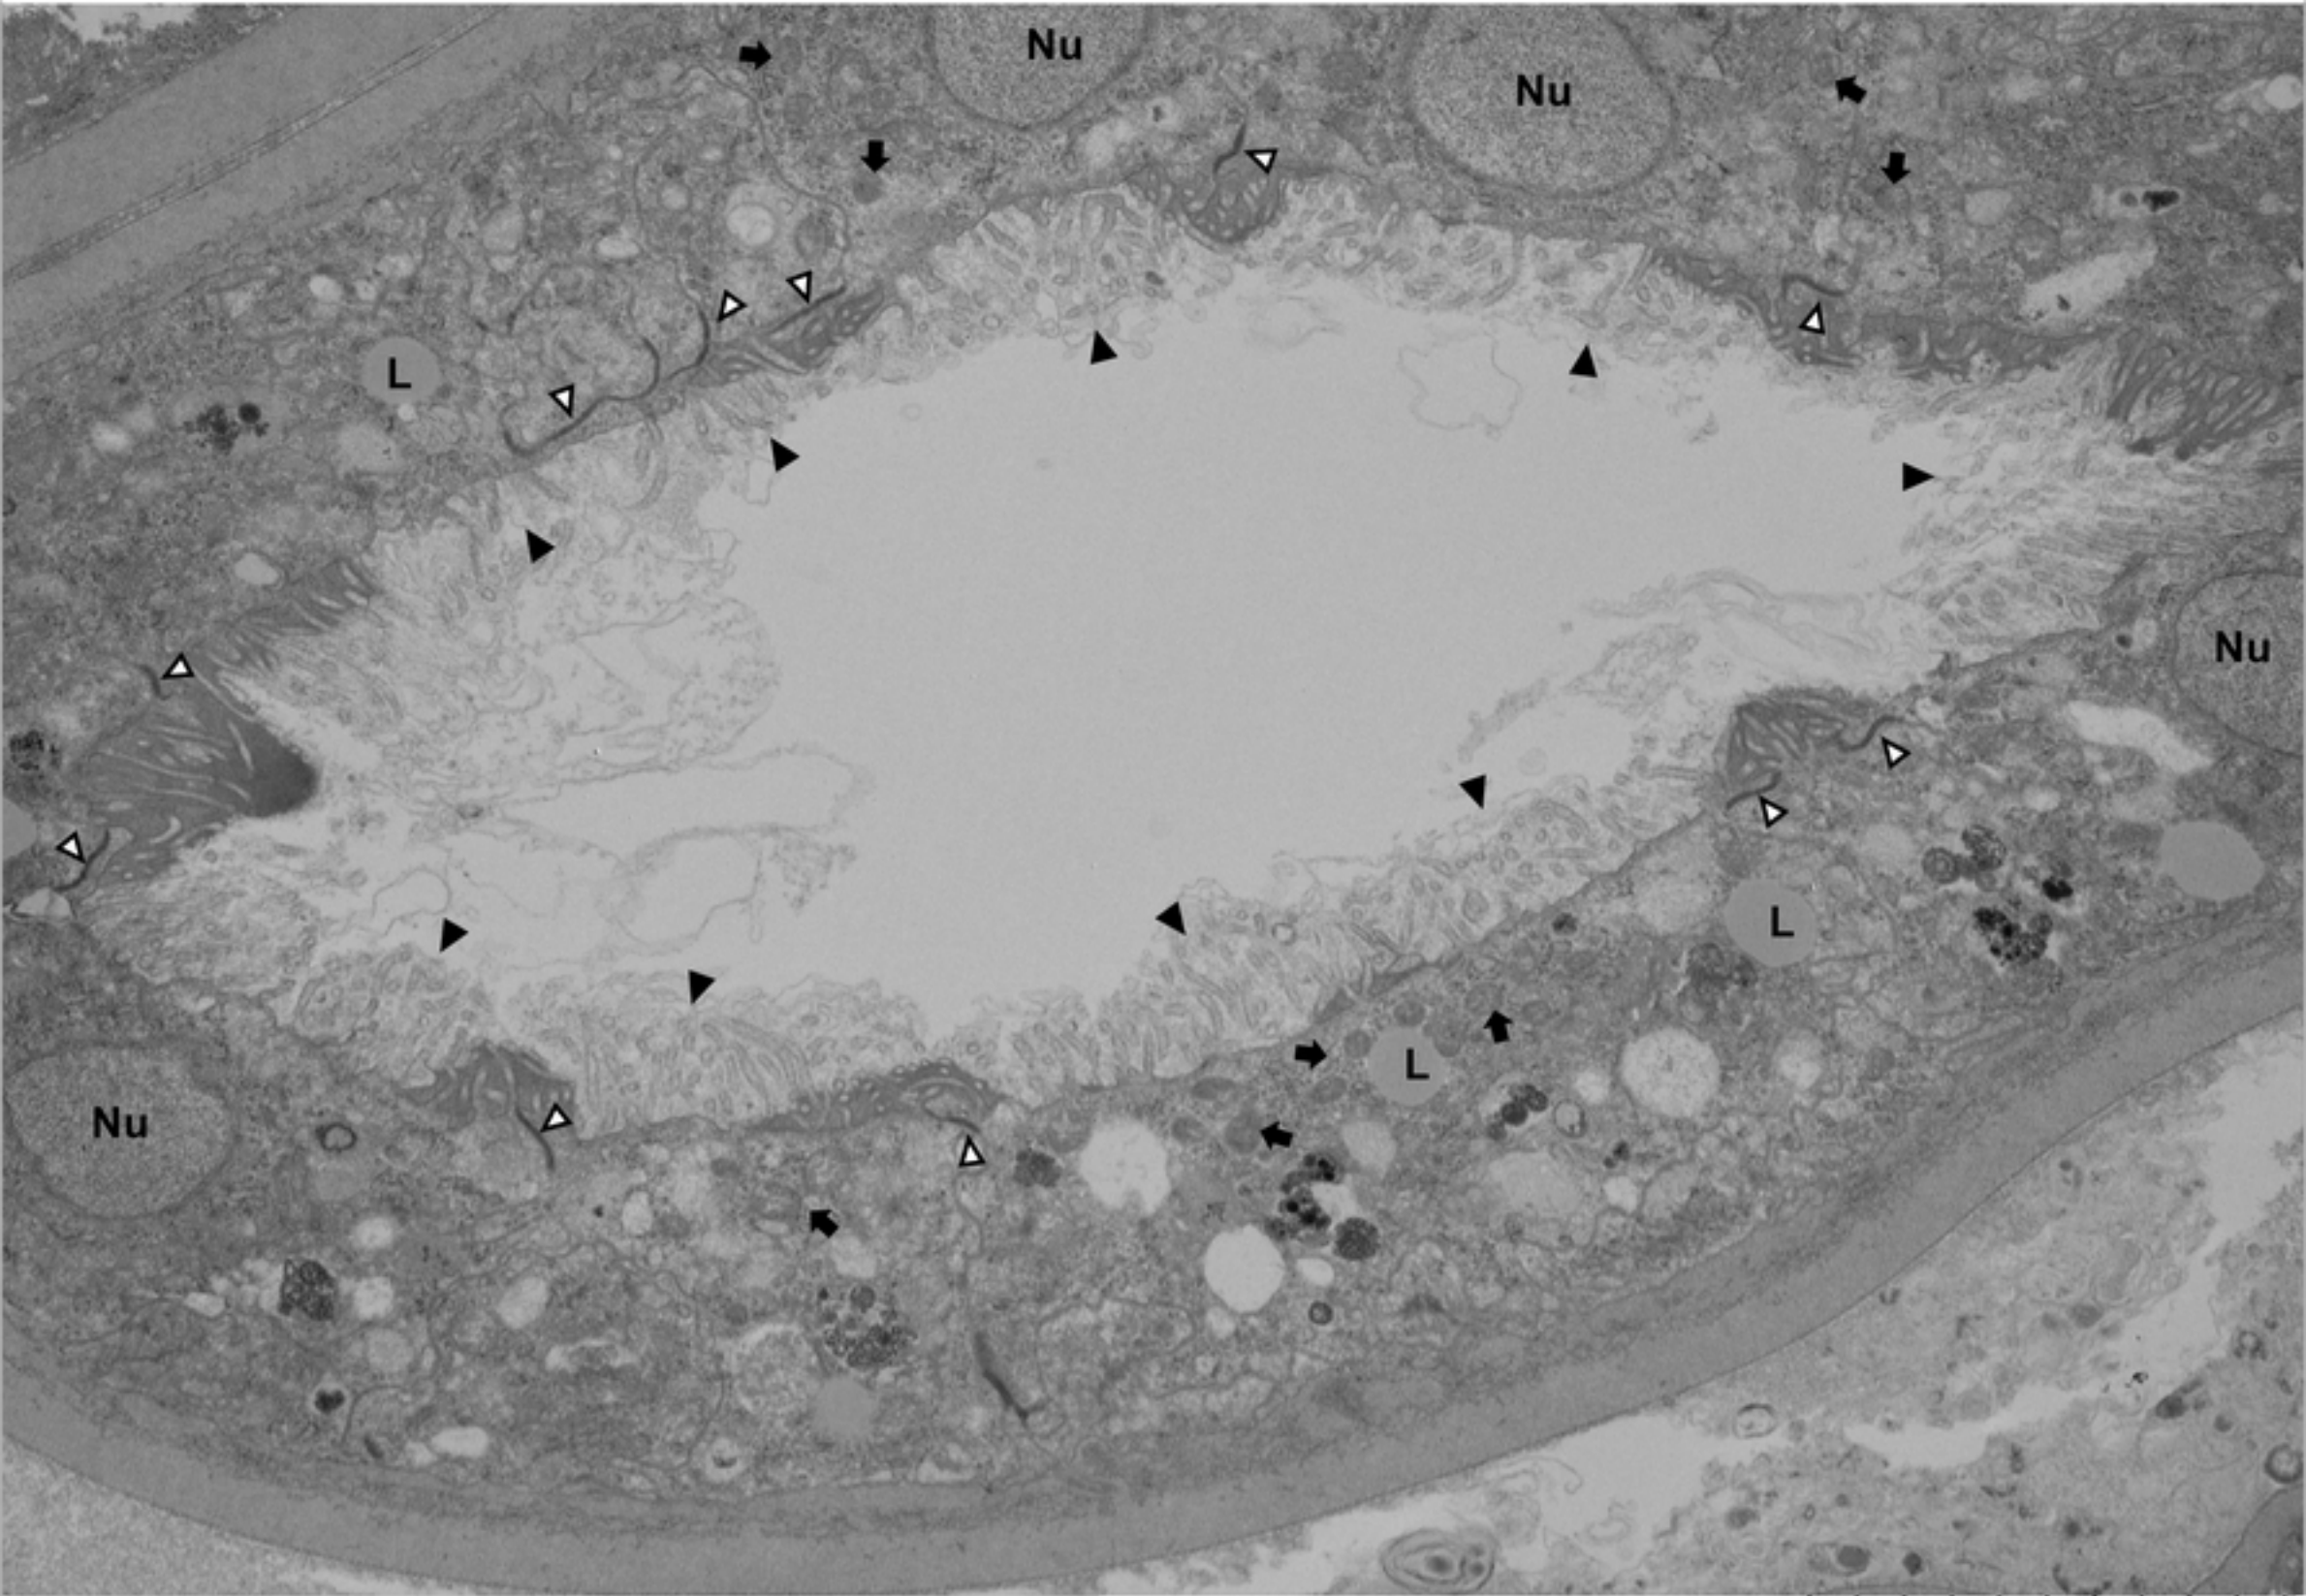

5.0μm

Fig 6

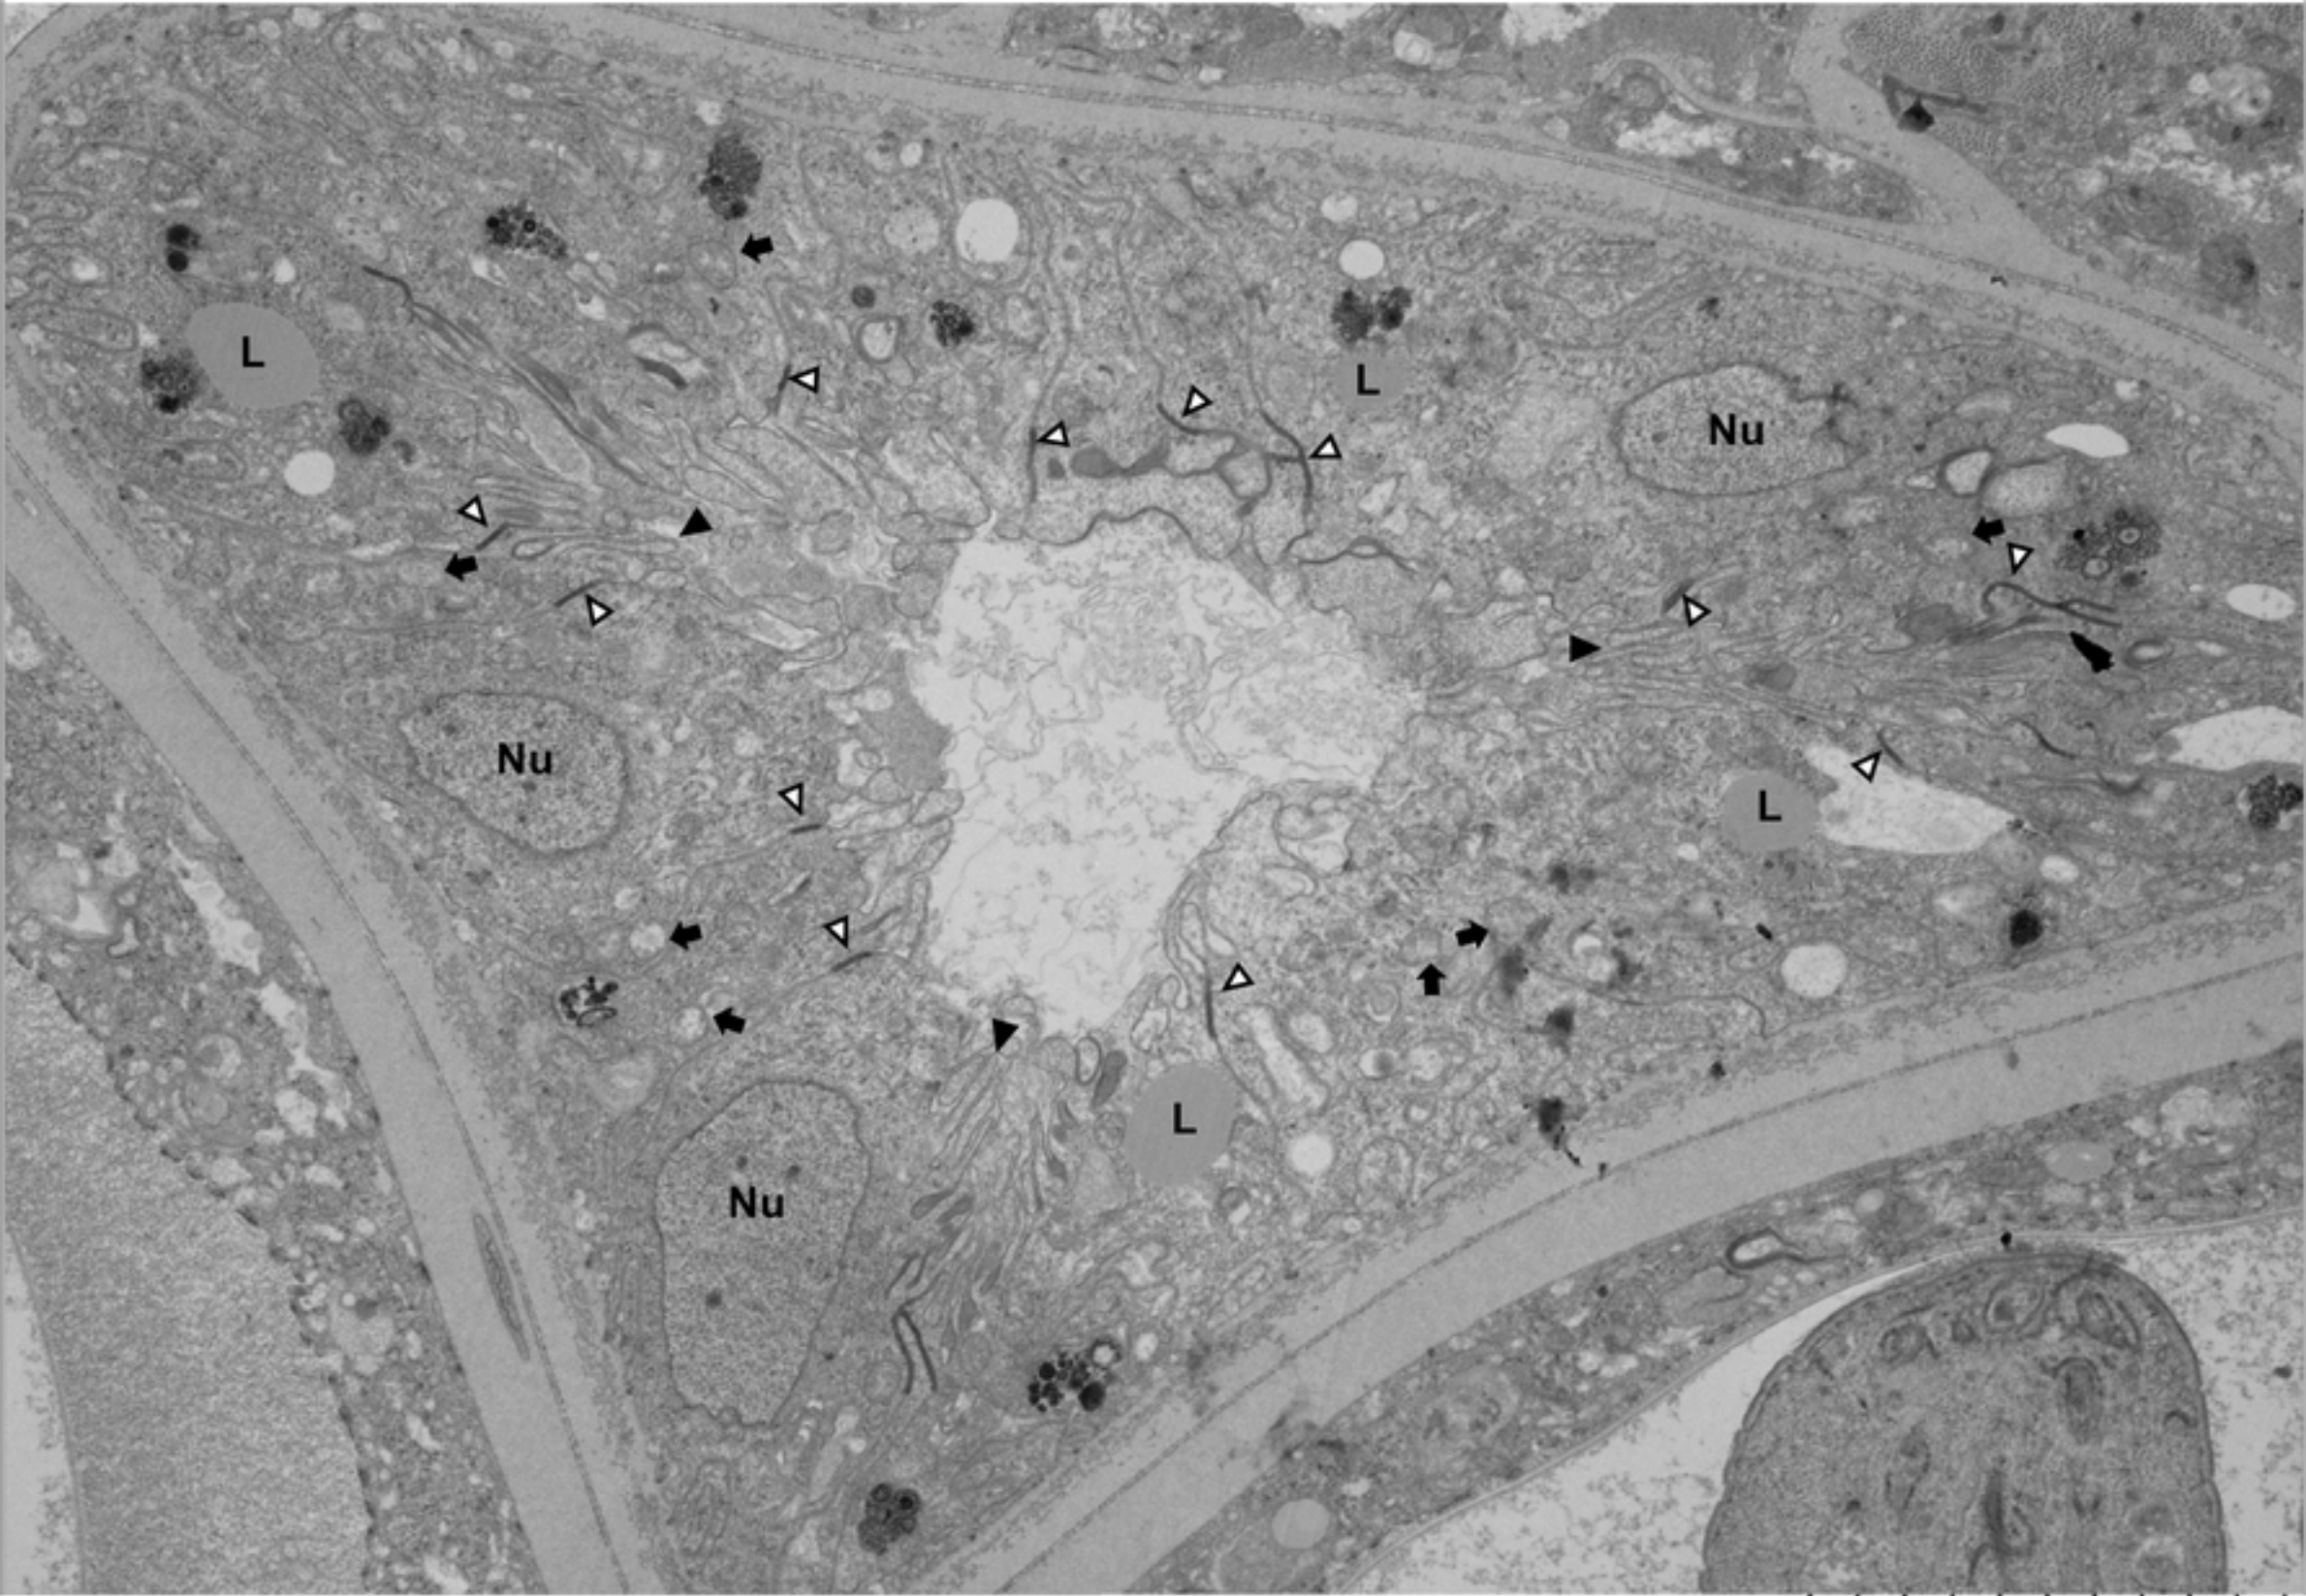

5.0µm

Fig 7



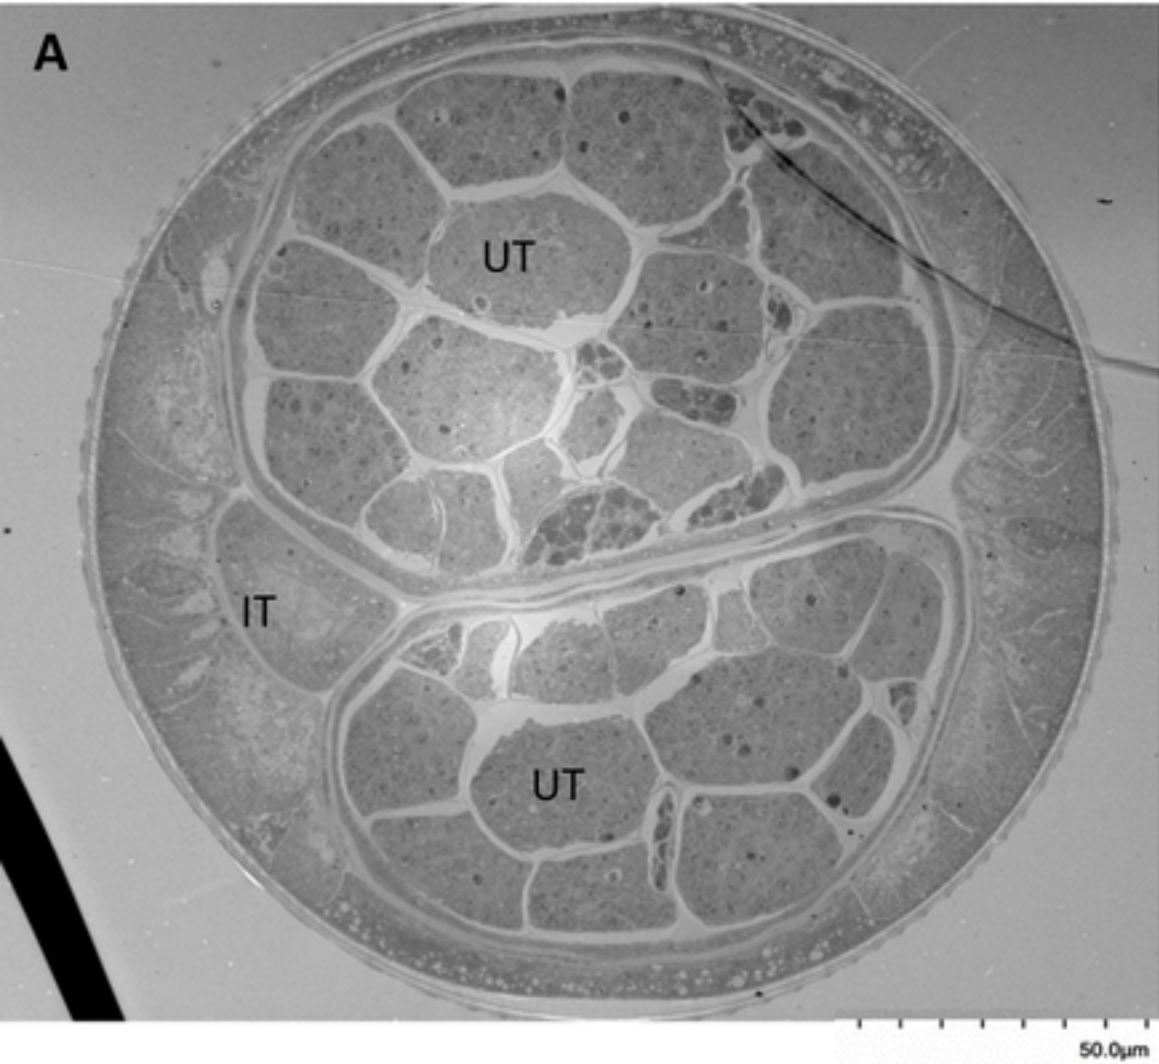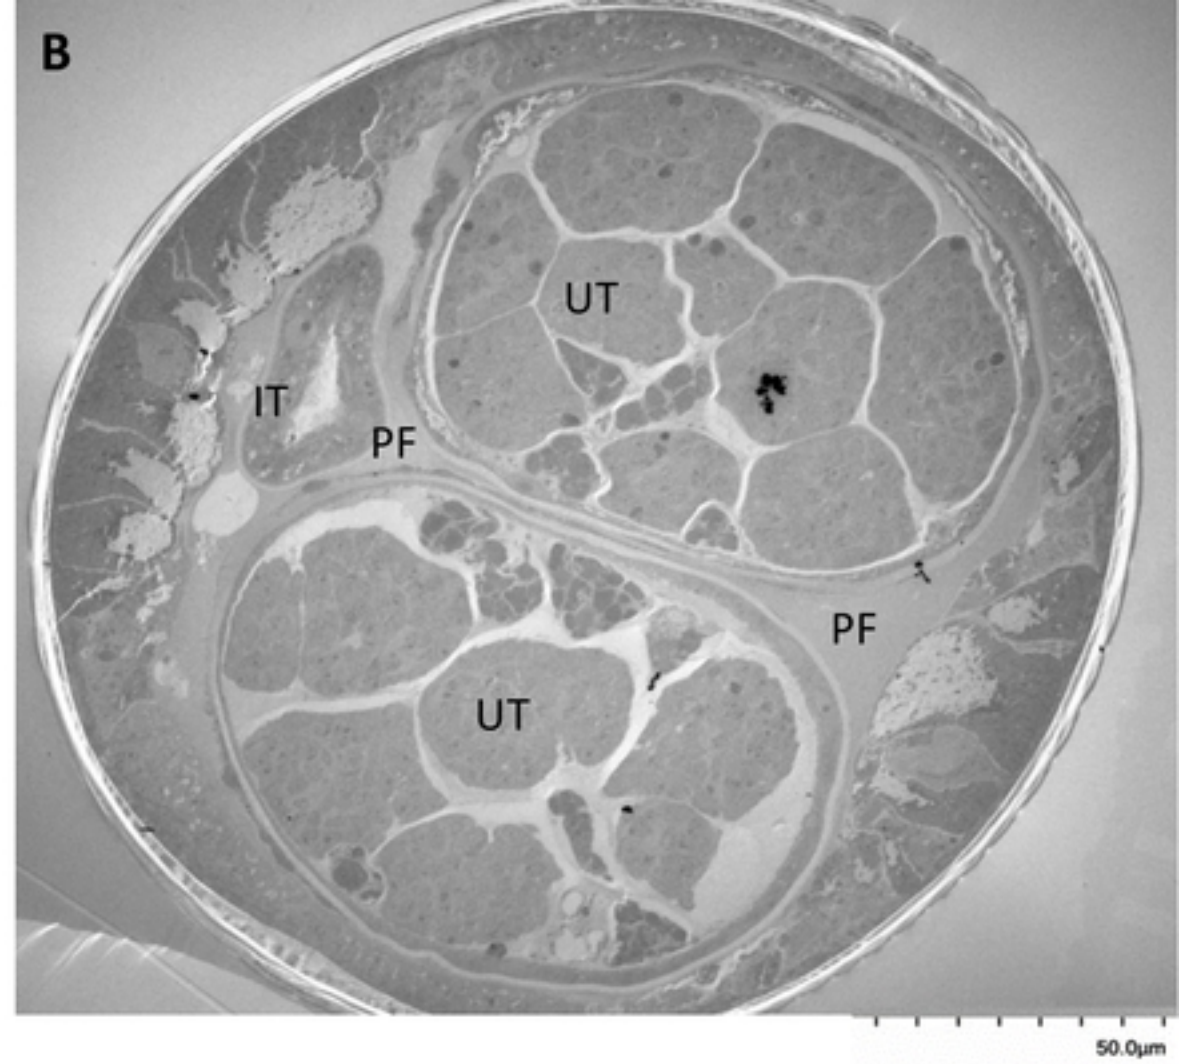

Fig 8

A

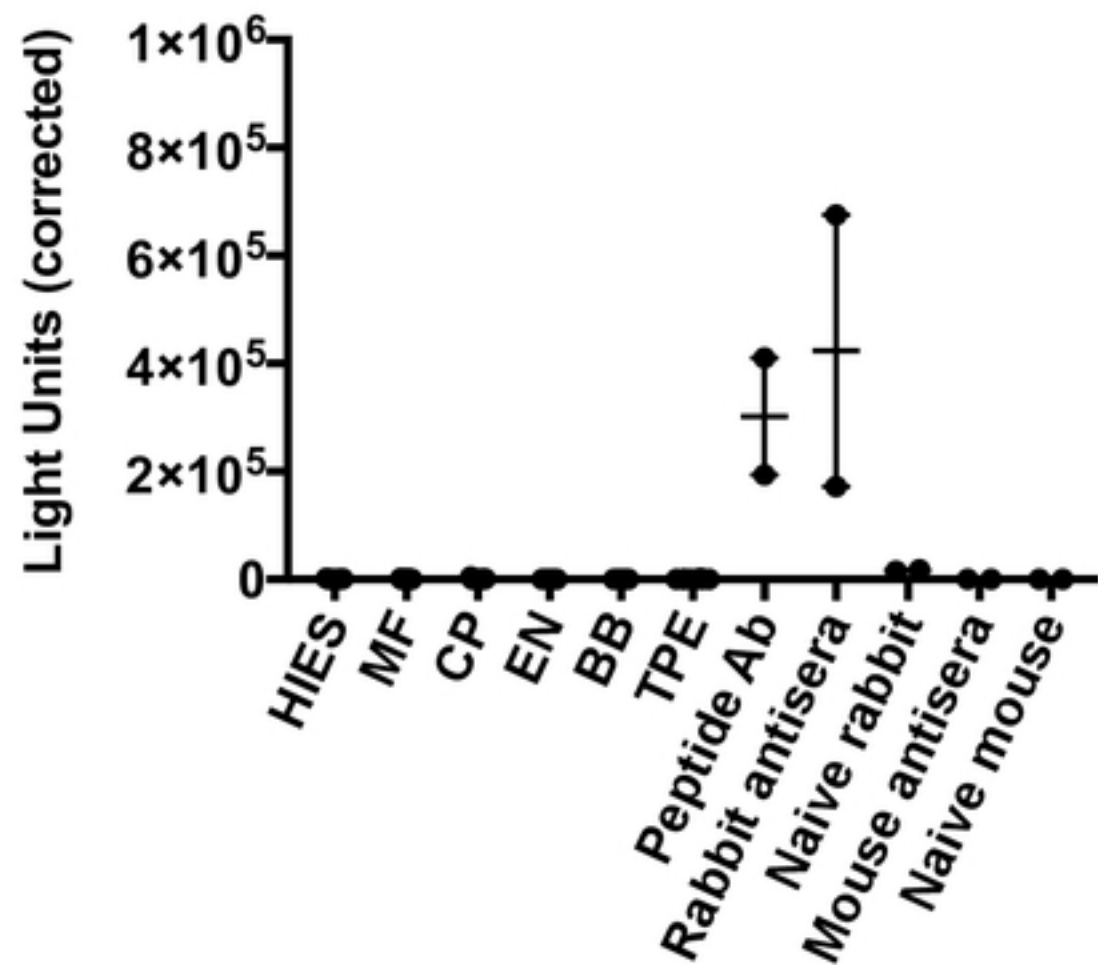

B

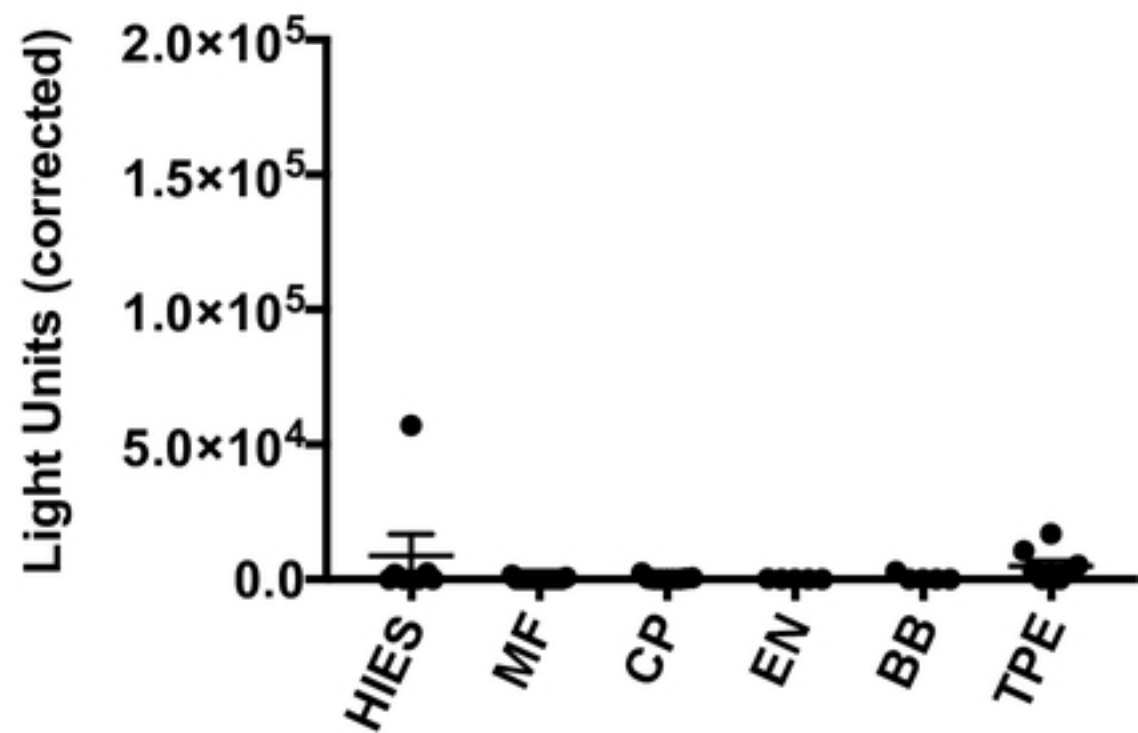

Fig 9
